# Supplementary material for: Chromosome-level genome of the globe skimmer dragonfly (Pantala flavescens)
Source: PubMed Central journal article supplement (PMC8978299; doi:10.1093/gigascience/giac009), 2022-04-04
Supplement: giac009_giga-d-21-00299_r1.pdf [file giac009_giga-d-21-00299_r1.pdf]

|                                                      |                                                                                                                                                                                                                                                                                                                                                                                                                                                                                                                                                                                                                                                                                                                                                                                                                                                                                                                                                                                                                                                                                                                                                                                                                                                                                                                                                                                                                                                       |             |
|------------------------------------------------------|-------------------------------------------------------------------------------------------------------------------------------------------------------------------------------------------------------------------------------------------------------------------------------------------------------------------------------------------------------------------------------------------------------------------------------------------------------------------------------------------------------------------------------------------------------------------------------------------------------------------------------------------------------------------------------------------------------------------------------------------------------------------------------------------------------------------------------------------------------------------------------------------------------------------------------------------------------------------------------------------------------------------------------------------------------------------------------------------------------------------------------------------------------------------------------------------------------------------------------------------------------------------------------------------------------------------------------------------------------------------------------------------------------------------------------------------------------|-------------|
| <b>Manuscript Number:</b>                            | GIGA-D-21-00299R1                                                                                                                                                                                                                                                                                                                                                                                                                                                                                                                                                                                                                                                                                                                                                                                                                                                                                                                                                                                                                                                                                                                                                                                                                                                                                                                                                                                                                                     |             |
| <b>Full Title:</b>                                   | Chromosome-level genome of the globe skimmer dragonfly ( <i>Pantala flavescens</i> )                                                                                                                                                                                                                                                                                                                                                                                                                                                                                                                                                                                                                                                                                                                                                                                                                                                                                                                                                                                                                                                                                                                                                                                                                                                                                                                                                                  |             |
| <b>Article Type:</b>                                 | Data Note                                                                                                                                                                                                                                                                                                                                                                                                                                                                                                                                                                                                                                                                                                                                                                                                                                                                                                                                                                                                                                                                                                                                                                                                                                                                                                                                                                                                                                             |             |
| <b>Funding Information:</b>                          | Shenzhen Science and Technology Program (KQTD20180411143628272)                                                                                                                                                                                                                                                                                                                                                                                                                                                                                                                                                                                                                                                                                                                                                                                                                                                                                                                                                                                                                                                                                                                                                                                                                                                                                                                                                                                       | Ms. wei fan |
|                                                      | Fund of Key Laboratory of Shenzhen (ZDSYS20141118170111640)                                                                                                                                                                                                                                                                                                                                                                                                                                                                                                                                                                                                                                                                                                                                                                                                                                                                                                                                                                                                                                                                                                                                                                                                                                                                                                                                                                                           | Ms. wei fan |
|                                                      | The Agricultural Science and Technology Innovation Program                                                                                                                                                                                                                                                                                                                                                                                                                                                                                                                                                                                                                                                                                                                                                                                                                                                                                                                                                                                                                                                                                                                                                                                                                                                                                                                                                                                            | Ms. wei fan |
| <b>Abstract:</b>                                     | <p>Background: The globe skimmer dragonfly (<i>Pantala flavescens</i>) is a notable Odonata insect distributed in nature fields and farmlands worldwide and is commonly recognized as a natural enemy, as it preys on agricultural pests and health pests. Composing one of the sister groups of winged insects, odonatan species are key to understanding insect evolution. Findings: We present a chromosome-level reference genome of <i>P. flavescens</i>, which is also the first chromosome-level genome in the Palaeoptera (a subclass of insects that are unable to flex their wings over their abdomen and includes the orders Odonata and Ephemeroptera). The assembled genome size was 662 Mb, with a contig N50 of 16.2 Mb. Via Hi-C scaffolding, 648 Mb (97.6%) of contig sequences were clustered, ordered and assembled into 12 large scaffolds, each corresponding to a natural chromosome. The repetitive sequences and gene density of the X chromosome were similar to those of autosomal sequences, but the X chromosome showed a much lower degree of heterozygosity. Our analysis shows that the effective population experienced three declining events, which may have been caused by climate change and environmental pollution. Conclusions: The genome of <i>P. flavescens</i> is conducive for the utilization of this species in pest control and provides more information on the biology and evolution of insects.</p> |             |
| <b>Corresponding Author:</b>                         | Wei Fan<br>Chinese Academy of Agricultural Sciences<br>CHINA                                                                                                                                                                                                                                                                                                                                                                                                                                                                                                                                                                                                                                                                                                                                                                                                                                                                                                                                                                                                                                                                                                                                                                                                                                                                                                                                                                                          |             |
| <b>Corresponding Author Secondary Information:</b>   |                                                                                                                                                                                                                                                                                                                                                                                                                                                                                                                                                                                                                                                                                                                                                                                                                                                                                                                                                                                                                                                                                                                                                                                                                                                                                                                                                                                                                                                       |             |
| <b>Corresponding Author's Institution:</b>           | Chinese Academy of Agricultural Sciences                                                                                                                                                                                                                                                                                                                                                                                                                                                                                                                                                                                                                                                                                                                                                                                                                                                                                                                                                                                                                                                                                                                                                                                                                                                                                                                                                                                                              |             |
| <b>Corresponding Author's Secondary Institution:</b> |                                                                                                                                                                                                                                                                                                                                                                                                                                                                                                                                                                                                                                                                                                                                                                                                                                                                                                                                                                                                                                                                                                                                                                                                                                                                                                                                                                                                                                                       |             |
| <b>First Author:</b>                                 | hangwei liu                                                                                                                                                                                                                                                                                                                                                                                                                                                                                                                                                                                                                                                                                                                                                                                                                                                                                                                                                                                                                                                                                                                                                                                                                                                                                                                                                                                                                                           |             |
| <b>First Author Secondary Information:</b>           |                                                                                                                                                                                                                                                                                                                                                                                                                                                                                                                                                                                                                                                                                                                                                                                                                                                                                                                                                                                                                                                                                                                                                                                                                                                                                                                                                                                                                                                       |             |
| <b>Order of Authors:</b>                             | hangwei liu                                                                                                                                                                                                                                                                                                                                                                                                                                                                                                                                                                                                                                                                                                                                                                                                                                                                                                                                                                                                                                                                                                                                                                                                                                                                                                                                                                                                                                           |             |
|                                                      | fan jiang                                                                                                                                                                                                                                                                                                                                                                                                                                                                                                                                                                                                                                                                                                                                                                                                                                                                                                                                                                                                                                                                                                                                                                                                                                                                                                                                                                                                                                             |             |
|                                                      | sen wang                                                                                                                                                                                                                                                                                                                                                                                                                                                                                                                                                                                                                                                                                                                                                                                                                                                                                                                                                                                                                                                                                                                                                                                                                                                                                                                                                                                                                                              |             |
|                                                      | hengchao wang                                                                                                                                                                                                                                                                                                                                                                                                                                                                                                                                                                                                                                                                                                                                                                                                                                                                                                                                                                                                                                                                                                                                                                                                                                                                                                                                                                                                                                         |             |
|                                                      | anqi wang                                                                                                                                                                                                                                                                                                                                                                                                                                                                                                                                                                                                                                                                                                                                                                                                                                                                                                                                                                                                                                                                                                                                                                                                                                                                                                                                                                                                                                             |             |
|                                                      | hanbo zhao                                                                                                                                                                                                                                                                                                                                                                                                                                                                                                                                                                                                                                                                                                                                                                                                                                                                                                                                                                                                                                                                                                                                                                                                                                                                                                                                                                                                                                            |             |
|                                                      | dong xu                                                                                                                                                                                                                                                                                                                                                                                                                                                                                                                                                                                                                                                                                                                                                                                                                                                                                                                                                                                                                                                                                                                                                                                                                                                                                                                                                                                                                                               |             |
|                                                      | boyuan yang                                                                                                                                                                                                                                                                                                                                                                                                                                                                                                                                                                                                                                                                                                                                                                                                                                                                                                                                                                                                                                                                                                                                                                                                                                                                                                                                                                                                                                           |             |
|                                                      | wei fan                                                                                                                                                                                                                                                                                                                                                                                                                                                                                                                                                                                                                                                                                                                                                                                                                                                                                                                                                                                                                                                                                                                                                                                                                                                                                                                                                                                                                                               |             |

**Order of Authors Secondary Information:**

**Response to Reviewers:**

GIGA-D-21-00299

Chromosome-level genome of the globe skimmer dragonfly (*Pantala flavescens*)  
hangwei liu; fan jiang; sen wang; hengchao wang; anqi wang; hanbo zhao; dong xu;  
boyuan yang; wei fan  
GigaScience

Dear Dr. Fan,

Your manuscript "Chromosome-level genome of the globe skimmer dragonfly (*Pantala flavescens*)" (GIGA-D-21-00299) has been assessed by our reviewers. Based on these reports, and my own assessment as Editor, I am pleased to inform you that it is potentially acceptable for publication in GigaScience, once you have carried out some essential revisions suggested by our reviewers.

Their reports, together with any other comments, are below. Please also take a moment to check our website at <https://www.editorialmanager.com/giga/> for any additional comments that were saved as attachments.

In addition, please register any new software application in the bio.tools and SciCrunch.org databases to receive RRID (Research Resource Identification Initiative ID) and biotoolsID identifiers, and include these in your manuscript. This will facilitate tracking, reproducibility and re-use of your tool.

Once you have made the necessary corrections, please submit a revised manuscript online at:

<https://www.editorialmanager.com/giga/>

If you have forgotten your username or password please use the "Send Login Details" link to get your login information. For security reasons, your password will be reset.

Please include a point-by-point within the 'Response to Reviewers' box in the submission system. Please ensure you describe additional experiments that were carried out and include a detailed rebuttal of any criticisms or requested revisions that you disagreed with. Please also ensure that your revised manuscript conforms to the journal style, which can be found in the Instructions for Authors on the journal homepage. If the data and code has been modified in the revision process please be sure to update the public versions of this too.

The due date for submitting the revised version of your article is 01 Feb 2022.

We look forward to receiving your revised manuscript soon.

Best wishes,

Hongfang Zhang  
GigaScience  
[www.gigasciencejournal.com](http://www.gigasciencejournal.com)

**Reviewer reports:**

Reviewer #1: This paper describes the sequencing, assembly and annotation of a dragonfly (*P. flavescens*) genome. Very importantly, the assembly is at chromosome level, making it extremely useful for anyone who wants to run reliable comparative genomics analyses. Effectively, the authors have produced a reference palaeopteran genome. In addition to generating this very useful genomic resource, the authors have run a couple of analyses such as the study of the effective population size along evolutionary time, and a phylogenomic analysis.

I did note that the BUSCO score of the gene set is less than that of the genome assembly. The truth is that the difference is small; only 0.7%. Nevertheless, this means that the gene prediction pipeline doesn't work very well. If BUSCO was able to find 98.8% of conserved genes, then a usually more "sophisticated" gene prediction pipeline should be able to find at least the same number of genes (if not more). Quite

often these genes could be missed because they're marked as repeats by RepeatModeler. For this reason, manual inspection of the "unknown" repeats is encouraged in order to exclude "normal" genes that look like repeats (e.g. duplicated genes). For the purposes of this Data Note and since the difference is small, I believe that it might not be necessary for the authors to improve the predicted gene set. If they decide to do so, then that would be great for anyone who would use their data in the future.

Response: Thanks for the reviewer's kind suggestion, and we have refined the repeat annotation and re-run the gene annotation.

To avoid protein-coding genes being marked as repeats, we aligned the 260 repeat sequences of 'unknown' type to NR database by blastx (v2.7.1+) using  $1e-5$  as cutoff, and 53 of them were found to have homology with known non-TE protein-coding genes, which were filtered out of RepeatModeler de novo library. Repeatmasker was then used to find TEs based on the filtered de novo TE library. After that, we re-run the gene annotation pipeline, and 15,354 genes were annotated. This time, we used the latest BUSCO (v5.2.2) version with insecta\_odb10 to assess the gene set, and showed that 98.9% genes was complete, higher than the value of genome 96.9%.

The method of genome annotation in line138 has also been updated.

Regarding the methodology and results on the effective population size, I'm not an expert and therefore I cannot judge their correctness. As for the phylogenomic analysis, it was properly done and the results obtained are correct.

Last, while I was able to have a look at the deposited raw reads (PacBio and Illumina) in SRA, I wasn't able to see the deposited assembly and gene set. I know that it is possible to generate "reviewer links" for SRA submissions, but I'm not sure if it is also the case for submitted genome assemblies and gene sets. If it is possible, could the authors generate such a link?

Response: Now the assembly has been released in NCBI (<https://www.ncbi.nlm.nih.gov/genome/103548>), and the gene set has also been uploaded to NCBI. These data are also available in AGIS ftp: [ftp://ftp.agis.org.cn/~fanwei/Pantala\\_flavscens/](ftp://ftp.agis.org.cn/~fanwei/Pantala_flavscens/)

Some minor corrections:

- Methods -> Evolutionary analysis: In the beginning of the section, where you mention the species you used, Zootermopsis is mentioned twice.

Response: We have revised it.

- Table S1: in the last column of the table, all numbers are "Gbp", not "G". The same is true for the numbers mentioned in the last column of Table 1; they should be "Mbp" and "Kbp".

Response: We have revised it.

- Table S2: I presume that the second column refers to homology-based prediction. If true, then please change the title of the column to "Homology", because "Homo" is confusing.

Response: We have revised "Homo" to "Homology".

- Table S3: "Counts" doesn't adequately describe the numbers in this column. Maybe something like "Number of genes with significant similarity" would be more appropriate.

Response: We have revised "Counts" to "Number of genes".

Reviewer #2: In this manuscript Hangwei Liu and co-authors report the sequencing and genome assembly of the dragonfly species, Pantala flavescens. This 662 Mb genome assembly is distributed in 12 chromosomes. Genome annotation resulted in almost 15,000 genes, corresponding to a high degree of completeness using BUSCO databases. The authors also identify the sexual chromosome (X) by comparing the ratio of sequenced reads between male and females. Finally, they performed an estimation of the demographic history and detected three events of population decline.

The work will be relevant for the fields of evolutionary biology, evolutionary genomics and researchers working in the evolution of insects. Although I am missing further analyses of different genome features that would increase the scope of the manuscript-

especially those mentioned in the introduction, such as the appearance of wings in insects or the study of gene families important for migration, insect ecology, etc. -, a chromosome grade genome of an Odonata species is of great value for the community. Therefore, I recommend the publication of this manuscript as a Data Note in GigaScience. However, I have some comments that should be addressed prior publication:

1. Since this is a Data note manuscript, a more detailed methodology would be recommended. It is not clear to me how many males or females have been used for the different sequencing protocols: for the PacBio Hifi one female was used, what about the Illumina and the RNA-seq?

Response: We have revised the sequencing protocols in method to make it clearer.

line 96: "For Illumina sequencing, a short paired-end DNA library with a 400 bp insert size from female and male adult *P. flavescens*" have been revised to "For Illumina sequencing, a short paired-end DNA library with a 400 bp insert size from a female adult and a male adult *P. flavescens*".

line 105: We revised "Total RNA was extracted separately from females and males and then mixed" to "Total RNA was extracted from a female adult and a male adult and then mixed to generate the libraries."

Line 124: We revised "A total of 170 Gb of Hi-C paired-end reads were generated" to "A total of 170 Gb of Hi-C paired-end reads were generated from a female adult"

- "Insects were removed from the intestine to avoid bacterial contamination,":  
Is it just bacterial contamination or also contamination from prey (insects?) genomes?  
Please clarify.

Response: The contamination includes bacterial and prey genomes. So, we have revised line93 "Insects were removed from the intestine to avoid bacterial contamination" to "Insects were removed from the intestine to avoid contamination from bacterial and prey genomes".

- "Total RNA was extracted separately from females and males and then mixed": Does it mean that the total RNA was mixed to generate the libraries or that libraries and sequencing was done independently for male and females and the data was merged for the subsequent analyses?

Response: Our meaning is that total RNA was mixed to generate the libraries. And to make it clearer, we revised line 105 "Total RNA was extracted separately from females and males and then mixed" to "Total RNA was extracted from a female adult and a male adult and then mixed to generate the libraries."

2. BUSCO analysis and comparisons. Perhaps a table with the percentage of completeness for the different arthropods would be clearer to visualize instead of the plot with the horizontal bars.

Response: We have changed Figure1b to a Table2.

- Also regarding the BUSCO data, it would be good if you listed the source of these numbers from other arthropods, referencing the primary articles, especially in the case of *Ladona fulva* (<https://doi.org/10.15482/USDA.ADC/1503790>.) and *Cloeon dipterum* (<https://doi.org/10.1038/s41467-020-16284-8>), since they are both respectively used as the most closely related genome or as an outgroup within the Paleoptera lineage along the entire manuscript. Actually, for the *C. dipterum* data, the original paper reported 96.9% complete and 1.3% fragmented whereas according to the figure 1b, *C. dipterum* genome has more than 97% of complete and around 1% of fragmented sets, could you explain this minor discrepancy?

Response: Thanks for the suggestion, and we have revised the reference and cited the primary articles about other genomes used in this manuscript.

The BUSCO assessments were performed by ourselves using BUSCO (5.2.2), not copied from reference papers. So, the discrepancy of *C. dipterum* BUSCO assessment between the original paper and this manuscript might be caused by different versions of BUSCO and insecta\_odb.

3. "Genomic resources for insects available in public databases are mainly focused on dipteran flies, lepidopterans and hymenopterans":

While it is true that historically available genomes belong mainly to Diptera, Lepidoptera and other holometabola, genome projects for hemimetabolous insects have been developed recently, thus acknowledging the existence of these efforts and new genomes would be desirable: see for instance crickets: Ylla et al. 2021(<https://doi.org/10.1038/s42003-021-02197-9>), Ephemeroptera: Almudi et al. 2020 (<https://doi.org/10.1038/s41467-020-16284-8>), damselfly: Ioannidis et al. 2017 (<https://doi.org/10.1093/gbe/evx006>), Sinella curviseta, collembola: Zhang et al. 2019 (<https://doi.org/10.1093/gbe/evz013>), giant collembolan: Wu et al. 2017 (<https://doi.org/10.1186/s12864-017-4197-1>), water strider: Armisén et al. 2018 (<https://doi.org/10.1186/s12864-018-5163-2>), cockroach: Harrison et al. 2018 (<https://doi.org/10.1038/s41559-017-0459-1>), among many others.

Response: Thanks for the suggestion, we have revised line67 "Genomic resources for insects available in public databases are mainly focused on dipteran flies, lepidopterans and hymenopterans, most of which are sanitary or agricultural pests. They do not capture the profile of whole insects, hindering the study of insect evolution."

into

"Genomic resources for insects available in public databases include dipteran flies, lepidopterans, hymenopterans, blattarias, and so on. However, only four genomes of Odonata species with low continuity have been released, and a high-quality genome of Odonata species is necessary for research."

4. The text needs some proofreading, I detected some typos or sentences that sound a bit odd:

- 4a. Page 4:

"... is the most parasitoid species used worldwide [3]."

I think that the authors probably meant:

"...is the parasitoid species most used worldwide"

Response: The sentence has been revised according to the reviewer's kind suggestion.

- 4b. Page 5:

"of Palaeopteran insects, which is the first winged insect and the sister of Neopterans" change to:

"of Palaeopteran insects, which are the first winged insects and the sister group of Neopterans "

Response: The sentence has been revised according to the reviewer's kind suggestion.

- 4c. Page 5:

"Powerful flight capabilities with varied wing dimorphism facilitate migration, escape and mating of winged insect (Pterygota), as well as more resources and habitats can be occupied by Pterygota insects." instead of "dimorphism facilitate winged insect (Pterygota) migration, escape and mating, and more resources and habitats can be occupied by Pterygota insects."

Response: The sentence has been revised according to the reviewer's kind suggestion.

- 4d. Page 5:

"Despite the attractiveness of this group for evolutionary genomic analysis, efforts have lagged behind for other insect orders." instead of "Despite the attractiveness of this group for evolutionary genomic analysis, efforts have lagged behind those of other insect orders."

Response: The sentence has been revised according to the reviewer's kind suggestion.

- 4e. Page 8:

"Zootermopsis nevadensis, Zootermopsis nevadensis," appears duplicated.

Response: The sentence has been revised according to the reviewer's kind suggestion.

|                                                                                                                                                                                                                                                                                                                                                                                                                                                                                                                                     |                                                                                                                                                                                                                                                                                                                                                                                                                                                                                                                                                                                                                                                                                                                                                                                                                                   |
|-------------------------------------------------------------------------------------------------------------------------------------------------------------------------------------------------------------------------------------------------------------------------------------------------------------------------------------------------------------------------------------------------------------------------------------------------------------------------------------------------------------------------------------|-----------------------------------------------------------------------------------------------------------------------------------------------------------------------------------------------------------------------------------------------------------------------------------------------------------------------------------------------------------------------------------------------------------------------------------------------------------------------------------------------------------------------------------------------------------------------------------------------------------------------------------------------------------------------------------------------------------------------------------------------------------------------------------------------------------------------------------|
|                                                                                                                                                                                                                                                                                                                                                                                                                                                                                                                                     | <p>- 4f. Page 9:<br/> "Therefore, the genome assembly of P. flavescens is a high-quality and highly contiguous genome." instead of "Therefore, the genome assembly of P. flavescens presents is highly contiguous and has a high sequence quality."<br/> Response: The sentence has been revised according to the reviewer's kind suggestion.</p> <p>5. Supplementary figure legends are missing, a brief description of the figure should be added besides the title of the figure.<br/> Response: We have added figure legends and a brief description to Supplementary figures.</p> <p>Please also take a moment to check our website at for any additional comments that were saved as attachments. Please note that as GigaScience has a policy of open peer review, you will be able to see the names of the reviewers.</p> |
| <b>Additional Information:</b>                                                                                                                                                                                                                                                                                                                                                                                                                                                                                                      |                                                                                                                                                                                                                                                                                                                                                                                                                                                                                                                                                                                                                                                                                                                                                                                                                                   |
| <b>Question</b>                                                                                                                                                                                                                                                                                                                                                                                                                                                                                                                     | <b>Response</b>                                                                                                                                                                                                                                                                                                                                                                                                                                                                                                                                                                                                                                                                                                                                                                                                                   |
| Are you submitting this manuscript to a special series or article collection?                                                                                                                                                                                                                                                                                                                                                                                                                                                       | No                                                                                                                                                                                                                                                                                                                                                                                                                                                                                                                                                                                                                                                                                                                                                                                                                                |
| <p><b>Experimental design and statistics</b></p> <p>Full details of the experimental design and statistical methods used should be given in the Methods section, as detailed in our <a href="#">Minimum Standards Reporting Checklist</a>. Information essential to interpreting the data presented should be made available in the figure legends.</p> <p>Have you included all the information requested in your manuscript?</p>                                                                                                  | Yes                                                                                                                                                                                                                                                                                                                                                                                                                                                                                                                                                                                                                                                                                                                                                                                                                               |
| <p><b>Resources</b></p> <p>A description of all resources used, including antibodies, cell lines, animals and software tools, with enough information to allow them to be uniquely identified, should be included in the Methods section. Authors are strongly encouraged to cite <a href="#">Research Resource Identifiers</a> (RRIDs) for antibodies, model organisms and tools, where possible.</p> <p>Have you included the information requested as detailed in our <a href="#">Minimum Standards Reporting Checklist</a>?</p> | Yes                                                                                                                                                                                                                                                                                                                                                                                                                                                                                                                                                                                                                                                                                                                                                                                                                               |

|                                                                                                                                                                                                                                                                                                                                                                                                                                                                                                                                                         |            |
|---------------------------------------------------------------------------------------------------------------------------------------------------------------------------------------------------------------------------------------------------------------------------------------------------------------------------------------------------------------------------------------------------------------------------------------------------------------------------------------------------------------------------------------------------------|------------|
| <p><b>Availability of data and materials</b></p> <p>All datasets and code on which the conclusions of the paper rely must be either included in your submission or deposited in <a href="#">publicly available repositories</a> (where available and ethically appropriate), referencing such data using a unique identifier in the references and in the “Availability of Data and Materials” section of your manuscript.</p> <p>Have you have met the above requirement as detailed in our <a href="#">Minimum Standards Reporting Checklist</a>?</p> | <p>Yes</p> |
|---------------------------------------------------------------------------------------------------------------------------------------------------------------------------------------------------------------------------------------------------------------------------------------------------------------------------------------------------------------------------------------------------------------------------------------------------------------------------------------------------------------------------------------------------------|------------|

1 **Chromosome- level genome of the globe skimmer dragonfly**  
2 **(*Pantala flavescens*)**

3 Hangwei Liu, Fan Jiang, Sen Wang, Hengchao Wang, Anqi Wang, Hanbo Zhao, Dong  
4 Xu, Boyuan Yang, Wei Fan\*

5

6 Guangdong Laboratory for Lingnan Modern Agriculture (Shenzhen Branch), Genome Analysis Laboratory of the  
7 Ministry of Agriculture and Rural Affairs, Agricultural Genomics Institute at Shenzhen, Chinese Academy of  
8 Agricultural Sciences, Shenzhen, Guangdong, 518120, China

9

10 \*Correspondence address. Wei Fan, Agricultural Genomics Institute at Shenzhen, Chinese Academy of Agricultural Sciences, 7

11 Pengfai Road, Shenzhen 518120, China. E-mail: [fanwei@caas.cn](mailto:fanwei@caas.cn).

12 Wei Fan [0000-0001-5036-8733];

13 Hangwei Liu [0000-0002-4931-1307];

14 Fan Jiang [0000-0003-1359-0970];

15 Sen Wang [0000-0001-9793-4472];

16 Hengchao Wang [0000-0002-8754-4195];

17 Anqi Wang [0000-0001-9367-2524];

18 Hanbo Zhao [0000-0001-9371-777X];

19 Dong Xu [0000-0001-6180-182X];

20 Boyuan Yang [0000-0001-7116-8167];

21

22 **ABSTRACT**

23 **Background:** The globe skimmer dragonfly (*Pantala flavescens*) is a notable Odonata  
24 insect distributed in nature fields and farmlands worldwide, and it is commonly  
25 recognized as a natural enemy as it preys on agricultural pests and health pests. As one  
26 of the sister groups of winged insects, odonatan species are key to understanding the  
27 evolution of insect wings. **Findings:** We present a high-quality reference genome of  
28 *P. flavescens*, which is the first chromosome- level genome in the Palaeoptera  
29 (Odonata and Ephemeroptera). The assembled genome size was 662 Mb, with a contig



30 N50 of 16.2 Mb. Via Hi-C scaffolding, 648 Mb (97.6%) of contig sequences were  
31 clustered, ordered and assembled into 12 large scaffolds, each corresponding to a  
32 natural chromosome. The X chromosome was identified by sequence coverage depth.  
33 The repetitive sequences and gene density of the X chromosome are similar to those  
34 of autosomal sequences, but the X chromosome shows a much lower degree of  
35 heterozygosity. Our analysis shows that the effective population size experienced three  
36 declining events, which may have been caused by climate change and environmental  
37 pollution. **Conclusions:** The genome of *P. flavescens* provides more information on  
38 the biology and evolution of insects, and will help for the utilization of this species in  
39 pest control.

## 40 **Data Description**

### 41 **Background**

42 The use of predatory insects has resulted in enormous economic and ecological benefits  
43 [1]. There have been many successful cases, such as *Vedalia* ladybird beetle *Novius*  
44 *cardinalis* (Mulsant, 1850) in control of cottony cushion scale[2], and *Trichogramma*  
45 spp. used for control of Lepidoptera pests[3]. Many odonatan species are considered  
46 important natural enemies of many insect pests such as *Anopheles* mosquitoes, flies,  
47 and gnats [4]. The globe skimmer dragonfly *Pantala flavescens* (NCBI:txid185825), a  
48 member of the Libellulidae (Insecta: Odonata), occurs worldwide and contributes to  
49 control of agricultural pests and health pests [5]. Previous studies have revealed that *P.*  
50 *flavescens* is the most widespread species of the Odonata, widely distributed throughout  
51 the tropics and many temperate areas. *P. flavescens* has a powerful capability to migrate  
52 several thousand kilometers across the globe [6-8], and transoceanic migration of *P.*  
53 *flavescens* more than 10,000 km often occurs every October–December. However, *P.*  
54 *flavescens* has exhibited drastic population decreases in the last several hundred years  
55 due to environmental pollution and human activities [5].

56 Odonata are diverse, numerous, commonly observed and species rich, and more  
57 than 6000 species have been described [9, 10] ; these insects have strikingly colourful  
58 bodies, giant compound eyes and an active flying ability. Odonata consists of two main

59 suborders, Anisoptera (dragonflies) and Zygoptera (damselflies), which show  
60 significant discrepancies. Dragonflies are generally robust, and their wings spread flat  
61 at rest, while damselflies are slender and hold their wings over their abdomen at  
62 rest[9]. Odonatan species date to the Carboniferous (360-290 million years ago)  
63 according to many complete and well-preserved fossil records [11]. Odonata and  
64 Ephemeroptera (mayflies) are members of Palaeopteran insects, which are the first  
65 winged insect and the sister group of Neopterans[12]. The evolution of wings in insects  
66 is a major event, as the appearance of wings has promoted insects to become the largest  
67 and most abundant animal taxon on Earth[13, 14].

68 Genomic resources for Odonata available in public databases are much fewer than  
69 other orders of insects such as dipteran, lepidopteran, hymenopteran, and blattaria.  
70 Only four genomes of odonatan species (*Rhinocypha anisoptera*, *Calopteryx splendens*,  
71 *Ladona fulva*, *Ischnura elegans*) with low continuity have been released[15-17], and a  
72 high-quality genome of odonatan species is necessary for insect research. Recent  
73 advances in circular consensus sequencing (CCS), which can generate highly accurate  
74 (99.8%), long, high-fidelity (HiFi) reads[18], combined with sophisticated assembly  
75 software such as Hifiasm (Hifiasm, RRID:SCR\_021069) [19] and HiCanu[20]  
76 provide a promising way to generate high-quality reference genome sequence. In this  
77 study, we sequenced the genome of *P. flavescens*, as a representative odonatan species,  
78 with HiFi technology, and obtained a chromosome-level genome assembly, along with  
79 an integral comprehensive gene set. The high-quality genomic data enables the  
80 identification and analysis of the sex chromosome, and the inferring of evolution and  
81 demographic history.

82

## 83 **MATERIALS AND METHODS**

### 84 **Insect arrest and genomic sequencing**

85 Male and female *P. flavescens* adults were collected at ShenZhen Station of the Chinese  
86 Academy of Agricultural Sciences, Guangdong Province, China. Insects were removed  
87 from the intestine to avoid contamination from bacterial and prey genomes, cleaned

88 using 30% ethanol and ddH<sub>2</sub>O, and then immersed in liquid nitrogen.

89 For Illumina sequencing, a short paired-end DNA library with a 400 bp insert size  
90 from a female adult and a male adult *P. flavescens* was constructed using standard  
91 Illumina protocols and sequenced on an Illumina HiSeq 2500 platform (Illumina HiSeq  
92 2500 System, RRID:SCR\_016383). For PacBio HiFi sequencing, two libraries with  
93 ~15 kb insert sizes were constructed from a female adult using PacBio SMRT. PacBio  
94 long reads were sequenced using 2 cells on a PacBio Sequel II system (PacBio Sequel  
95 II System, RRID:SCR\_017990). A total of 831 Gb of subreads were generated with an  
96 N50 of 14.3 kb. Consensus reads (CCS reads) were generated using ccs software v.3.0.0  
97 [21] with the following parameters: --min-passes 0 --min-rq 0.99 --min-length 100 --  
98 max-length 50000. The total CCS read yield was 50 Gb, with a read length of 14.5 kb.

99 Total RNA was extracted from a female adult and a male adult and then mixed to  
100 generate the libraries. Synthesized full-length cDNAs were then used to prepare three  
101 20 kb SMRTbell template libraries for sequencing on a PacBio Sequel instrument.

## 102 **Genome assembly and quality assessment**

103 The PacBio reads were assembled using Hifiasm (0.12-r304) with the following  
104 parameters: -l 1 -s 0.7. This resulted in 196 contigs with a total length of ~691 Mb and  
105 a contig N50 of 15.8 Mb. To filter duplicate contigs in the assembly, purge\_dups  
106 (v1.2.3) (purge\_dups, RRID:SCR\_021173) [21] was used with the following  
107 parameters: -2 -a 50. This resulted in a purged primary assembly with a total length 662  
108 Mb and a contig N50 of 16.2 Mb.

109 The quality of the assembly was evaluated using BUSCO v5.2.2 (BUSCO,  
110 RRID:SCR\_015008) [22] based on OrthoDB v10 of Insecta (OrthoDB,  
111 RRID:SCR\_011980). Iso-seq full-length transcripts were also used to evaluate the  
112 accuracy of the genome. First, raw Iso-seq data were subjected to read quality filtering,  
113 read clustering, consensus calling and polishing using SMRT Analysis v.2.3 (SMRT-  
114 Analysis, RRID:SCR\_002942) [22] and then assembled into high-quality and full-  
115 length transcripts. These full-length transcripts were then aligned to the genome using  
116 GMAP (version 2020-10-27) (GMAP, RRID:SCR\_008992) [23] to evaluate the

117 structural accuracy of the assembly.

## 118 **Genome scaffolding**

119 A total of 170 Gb of Hi-C paired-end reads were generated from a female adult, with a  
120 Q30 of 92.28%. After quality control, the clean reads were mapped to the genome by  
121 Bowtie2 (v2.3.4.3) (Bowtie 2, RRID:SCR\_016368), and then HiC-Pro (v2.11.0) (HiC-  
122 Pro, RRID:SCR\_017643) was used to generate an alignment file to detect valid  
123 alignments and filter multiple hits and singletons. Finally, LACHESIS (LACHESIS,  
124 RRID:SCR\_017644) [24] was used to cluster, order and orient the contigs.

## 125 **Detection of X chromosome**

126 Clean Illumina female and male read data were mapped to the chromosome-level  
127 genome with BWA, and the sequencing depth was calculated with SAMtools  
128 (SAMTOOLS, RRID:SCR\_002105). The autosomes should have equal coverage,  
129 while the X chromosome should show approximately half coverage in males.

## 130 **Genome annotation**

131 *A de novo* repeat library was constructed with RepeatModeler (v1.0.8) (RepeatModeler,  
132 RRID:SCR\_015027) (parameters: -engine ncbi-database). RepeatMasker  
133 (RepeatMasker, RRID:SCR\_012954) was then used to identify TE repeats by  
134 combining the contents of the *de novo* repeat library and a TE database (Dfam 3.0,  
135 RRID:SCR\_021168 and RepBase 20170127, RRID:SCR\_021169). To avoid protein-  
136 coding genes being marked as repeats, we aligned the 260 repeat sequences of  
137 ‘unknown’ type to NR database by blastx (v2.7.1+) (BLASTX, RRID:SCR\_001653)  
138 using  $1e^{-5}$  as cutoff, and 53 of them were found to have homology with known non-TE  
139 protein-coding genes, which were filtered out of RepeatModeler *de novo* library.  
140 Repeatmasker was then used to find TEs based on the filtered *de novo* TE library.

141 *De novo* prediction of coding genes was performed using repeat-masked genome  
142 sequences. The gene model parameters of AUGUSTUS (Augustus,  
143 RRID:SCR\_008417) [25] were trained using Iso-seq full-length transcripts. For  
144 homology-based prediction, the protein sequences of odonatan species were

145 downloaded from the NCBI and UniProt (UniProt, RRID:SCR\_002380) databases and  
146 mapped to the genome with exonerate (version 2.4.0) (Exonerate, RRID:SCR\_016088),  
147 and incomplete gene models were filtered and removed. Quality-controlled reads from  
148 two RNA libraries (SRR1184263 and SRR1184243) were mapped to the genome using  
149 Bowtie2, and StringTie (StringTie, RRID:SCR\_016323) was employed to construct  
150 gene prediction models. Iso-seq full-length transcripts were mapped to the genome with  
151 GAMP. Finally, all the genes predicted with the four approaches were integrated with  
152 EVIDENCEModeler (EVIDENCEModeler, RRID:SCR\_014659) [26] to generate high-  
153 confidence gene sets (Table S2).

154 To evaluate the accuracy of the gene sets, the coverage of highly conserved genes  
155 was assessed using BUSCO based on OrthoDB v10 of Insecta. For gene functional  
156 annotation, we aligned the protein sequences of genes with the KEGG (KEGG,  
157 RRID:SCR\_012773), eggNOG (eggNOG, RRID:SCR\_002456), NR, and UniProt  
158 (SwissProt) databases in Diamond, with  $1e^{-5}$  used as a cutoff, and obtained the best hit.  
159 We also used InterProScan (v5.38-76.0) (InterProScan, RRID:SCR\_005829) to search  
160 the InterPro (InterPro, RRID:SCR\_006695) database to identify motifs and domains.

## 161 **Evolutionary analysis**

162 Fifteen sequenced arthropoda species, including *Parasteatoda tepidariorum*[27],  
163 *Strigamia maritima* [28], *Daphnia pulex* [29], *Folsomia candida* [30], *Catajapyx*  
164 *aquilonaris*, *L. fulva*[16], *P. flavescens*, *Cloeon dipterum* [31], *Zootermopsis*  
165 *nevadensis*[32], *Acyrtosiphon pisum*[33], *Drosophila melanogaster*[34], *Danaus*  
166 *plexippus*[35], *Tribolium castaneum*[36] and *Apis mellifera* [37], were used to infer  
167 orthologous genes in OrthoFinder (OrthoFinder, RRID:SCR\_017118) [38] with the  
168 default parameters. The protein sequences of single-copy genes from each species were  
169 aligned in MUSCLE (v3.8.1551) (MUSCLE, RRID:SCR\_011812) [39] and then  
170 concatenated into one supersequence. RAxML (version 8.2.12) (RAxML,  
171 RRID:SCR\_006086) [40] was subsequently used to construct a phylogenetic tree based  
172 on the concatenated supersequence with the PROTGAMMALGX model. Divergence  
173 times among species were calculated in MCMCtree (PAML package, v. 4.9) (PAML,

174 RRID:SCR\_014932) [41]. The calibration times were set according to the data in a  
175 previous paper: a minimum of 308 Mya and maximum of 366 Mya for *D. melanogaster*  
176 and *A. pisum*, a minimum of 413 Mya and maximum of 483 Mya for *D. melanogaster*  
177 and *C. aquilonaris*, a minimum of 413 Mya and maximum of 483 Mya for *D.*  
178 *melanogaster* and *C. aquilonaris*, and a minimum of 452 Mya and maximum of 557  
179 Mya for *D. pulex* and *A. pisum* [12]. The phylogenetic tree and gene results were  
180 displayed and annotated using Evolview [42].

## 181 **Demographic history**

182 Raw reads were processed to obtain clean reads using fastp (0.20.0) (fastp,  
183 RRID:SCR\_016962) [43]. The quality-controlled reads were mapped to the genome  
184 using BWA (version 0.7.15) (BWA, RRID:SCR\_010910), with the default parameters.  
185 SAMtools (version 1.4) was used for sorting, and Picard (v.2.17.0) (Picard,  
186 RRID:SCR\_006525) was used to remove duplicates. SNP calling was then performed  
187 using the GATK (4.0.4.0) (GATK, RRID:SCR\_001876) HaplotypeCaller. To obtain  
188 high-quality SNPs, we initially used the GATK hard filter to remove the merged VCF  
189 data with the following options:  $QD \geq 2.0$  &&  $FS \leq 60.0$  &&  $MQ \geq 40.0$  &&  
190  $MQRankSum \geq -12.5$  &&  $ReadPosRankSum \geq -8.0$ . SNPs present on the X  
191 chromosomes were excluded to avoid potential bias by sex. Female and male data were  
192 used to estimate demographic history using SMC++[44]. We used a mutation rate of  $1$   
193  $\times 10^{-9}$  per generation per year, and one generation per year.

## 194 **Results**

### 195 **Chromosome-level genome assembly of *P. flavescens***

196 To obtain a high-quality genome, 50 Gb (80-fold) of high-fidelity (HiFi) reads (Table  
197 S1) from an adult female were generated with a read N50 length of 14.5 kb. Before  
198 genome *de novo* assembly, a genome survey based on k-mer frequency showed that  
199 the genome size is 663 Mb (Figure S1). The total length of the genome assembly  
200 produced by Hifiasm is approximately 691 Mb, comprising 196 contigs with an N50  
201 size of 15.8 Mb. This genome assembly is slightly larger than the estimated genome  
202 size, which may result from genome heterozygosity. Using purge\_dups to reassign

203 allelic contigs, a reference assembly was generated comprising 99 contigs with a total  
204 length of 662 Mb (Table 1), which is comparable to the estimated genome size. The  
205 contig N50 size of the genome assembly is 16.2 Mb, and the longest contig is 41.7  
206 Mb. The completeness of the draft genome was evaluated via benchmarking universal  
207 single-copy orthologs (BUSCO) [22]. Of the 1,367 single-copy orthologous genes in  
208 the BUSCO insecta\_odb10 database, 1,325 (96.9%) were identified in this draft  
209 genome, including 1,280 (93.6%) complete and single-copy BUSCO genes and 45  
210 (3.3%) complete and duplicated BUSCO genes. A total of 45,601 transcripts produced  
211 using PacBio single-molecule long-read sequencing were mapped to the genome  
212 assembly with GAMP (version 2020-10-27)[23] , and 99.5% (45,366) were mapped  
213 successfully with an average identity of 99.1% and an average coverage of 98.4%.  
214 These results also reflect the high accuracy of our assembly.

215 The LACHESIS pipeline was employed to anchor and orient 648 Mb (97.6%) of  
216 contigs to 12 pseudochromosomes (Table 1, Figure 1, Figure S2), which corresponded  
217 to the 12 chromosomes. The N50 size of this chromosome-level genome was 53 Mb,  
218 with the longest 79 Mb and the shortest 36 Mb. Approximately 80% of the 31  
219 unanchored contigs constituted repetitive sequences, indicating that most unanchored  
220 contigs were repeat fragments.

221 A total of 117 Mb (17.8% of the nuclear genome) of interspersed repeats were  
222 identified in the *P. flavescens* genome (Table 1). Among them, DNA (31 Mb), LINEs  
223 (13 Mb) and LRTs (1.3 Mb) were the major types of TEs. A total of 15,354 protein-  
224 coding gene models were predicted by EVIDENCEModeler (Table S2), with an average  
225 CDS length of 1,528 bp and an average exon number of 7.1, comparable to that of  
226 other published insects. In terms of evaluating the completeness of the predicted gene  
227 sequences with the sequences of 1,367 BUSCO genes from insecta\_odb10, 1,352  
228 BUSCOs (98.9%) were determined to be complete, which is better to that of the  
229 genome (96.9%). Compared to those of the other two Palaeopteran species, *C.*  
230 *dipterum* and *L. fulva*, the BUSCO complete ratio of *P. flavescens* is the highest  
231 (Table2). For functional annotation, 12,995 (85%), 12,417 (81%) and 10,346 (67%)  
232 genes have homologous sequences in the NR, Uniprot and KEGG databases,

233 respectively. In addition, 13,240(86%) genes were annotated by InterProScan. In  
234 summary, 14,024 (91%) genes were annotated by at least one functional databases or  
235 methods (Table S3).

## 236 **X chromosome identification**

237 Sex chromosomes evolved from autosomes and play important roles in tissue  
238 development, mating and speciation [45-47]. A previous study showed that *P.*  
239 *flavescens* has an XO sex determination, in which females possess two X  
240 chromosomes and males possess one X chromosome [48]. The X chromosome was  
241 determined by mapping resequencing data from males and females to the genome  
242 assembly. In males, the average depth of chr12 was almost half that of the other  
243 chromosomes, and the average depths of all chromosomes in females were similar  
244 (Figure 2a). Therefore, chr12, which has a total length of 36.2 Mb and contains 6  
245 contigs, was designated as the X chromosome. This is the shortest chromosome and is  
246 consistent with karyotype[48]. XO sex determination has also been discovered in  
247 Orthoptera and some Hemiptera species such as aphids and psyllids [49, 50]. In  
248 aphids, the characteristics of the X chromosome are different from those of the  
249 autosomal chromosomes. The X chromosome of *A. pisum* (aphids) is enriched in  
250 repetitive sequences, and the gene density is lower than that of the autosomes[51].  
251 However, in *P. flavescens*, repeat sequences constitute 20.8% of the X chromosome,  
252 comparable to that of the autosomal sequences (17.6%), and the gene density is also  
253 comparable between the X chromosome and autosomals.

254 The heterozygosity of the *P. flavescens* genome was estimated by heterozygous  
255 single-nucleotide polymorphisms (SNPs), and a sharp decrease in heterozygosity was  
256 noticed. The heterozygosity of the X chromosome is 0.5%, which is less than half that  
257 of the autosomes (1.3%) (Figure 2b). The evolution of sex chromosomes is poorly  
258 understood in Palaeopteran insects. Here, we present the first X chromosome  
259 sequence information in Palaeopteran insects, which may promote research on the  
260 evolution of sex chromosomes.

## 261 **The population size decline**



262 To investigate the genome evolutionary history of *P. flavescens*, gene family members  
263 were subjected to clustering analysis using *P. flavescens* and 14 other arthropoda  
264 species, including chelicerates, myriapods, crustaceans, and hexapods[16]. From the  
265 gene family clustering results, 447 single-copy orthologs shared between *P. flavescens*  
266 and 14 other arthropoda species were used for phylogenetic construction and species  
267 divergence time estimation, representing arthropod evolution spanning more than 500  
268 million years. We estimated that *P. flavescens* and *L. fulva* shared a common ancestor  
269 at ~125 Ma, and divergence of *P. flavescens* and *C. dipterum* was estimated to have  
270 occurred at ~420 Ma (Fig. 2a). Our phylogenetic tree and estimated divergence time  
271 are mostly consistent with previous arthropod phylogenetic studies[12, 16].

272 Effective population size ( $N_e$ ) is considered a pivotal parameter in population  
273 genetics and has been applied in the analysis of evolutionary biology, conservation  
274 genetics and animal molecular breeding, as it measures genetic drift and inbreeding in  
275 real-world populations. A decline in population size comes with a loss of genetic  
276 diversity and an increase in inbreeding[52, 53], which is harmful for adaptation to  
277 complex environments. Global climate change has been recognized to profoundly  
278 reshape animal population demographics [17, 54]. Monitoring the changes in effective  
279 population size over time for wild species is important for understanding genetic  
280 health and evaluating the risk of extinction. Here, we estimated the history of  
281 population sizes using SMC++[44], and identified three events in which the  
282 population declined severely (Fig. 3b). The most ancient decline occurred during the  
283 Penultimate Glaciation [0.30–0.13 Ma], and afterwards, population expansion  
284 occurred. The second declination occurred at the Last Glacial Maximum (LGM;  
285 approximately 26.5–19 ka)[55] , which is the most recent period of extreme cold.  
286 Many wild species, such as pandas, buffaloes and ibis, experienced significant  
287 population declines during these two periods [56-58]. The results also revealed  
288 population declines in the last several thousand years (Figures 3b), which might be  
289 due to recent human exploitation and habitat loss. Evidence has indicated that, while  
290 global climate change has been the primary driver of population fluctuations for  
291 millions of years, human activities likely underlie recent population divergence and

292 severe decline. Further genome resequencing of *P. flavescens* will provide more  
293 detailed insights into the demographic history.

## 294 **DISCUSSION**

295 Here, we present a 662 Mb chromosome-scale reference genome of *P. flavescens*  
296 obtained using PacBio HiFi and Hi-C data, which is the first chromosome-scale  
297 reference genome in the Palaeoptera, and we also identified sex chromosomes in the  
298 Palaeopterans for the first time. The high BUSCO complete ratio and RNA mapping  
299 percentage confirmed the high quality of the reference genome assembly. Our analysis  
300 showed three events in which the population declined severely. The key features of  
301 odonatan species, including their ancient phylogenetic position, strong migration  
302 capability and complex living environment, make *P. flavescens* to be a potential model  
303 of insect species. The genome and gene data of *P. flavescens* would facilitate the  
304 exploration of many important evolutionary, developmental and physiological studies  
305 on insects. Furthermore, *P. flavescens* preys on many agricultural and sanitary pests,  
306 this species has great potential for use in pest control. Our data and results will also  
307 help the development of pest management technologies.

308

## 309 **Data Availability**

310 All the raw sequencing data and genome data in this study have been deposited at  
311 NCBI as a BioProject under accession PRJNA763384. Genomic sequence reads have  
312 been deposited in the SRA database with Accession: SRR15902700, SRR15902700,  
313 SRR15910096, SRR15910131. Transcriptome sequence reads have been deposited in  
314 the SRA database with Accession: SRR15914636. Raw data of Hi-C have been  
315 deposited in the SRA database with Accession: SRR15910100. Genome assembly has  
316 been deposited at DDBJ/ENA/GenBank under the accession JAIUJI010000000.  
317 Supporting data and materials are available in the *GigaDB* database [61].

## 318 **Competing Interests**

319 The authors declare that they have no competing interests.

320 **Funding**

321 Shenzhen Science and Technology Program (Grant No. KQTD20180411143628272); Fund of  
322 Key Laboratory of Shenzhen (ZDSYS20141118170111640); The Agricultural Science and  
323 Technology Innovation Program.

324 **Authors' Contributions**

325 H.L., A.W. and D.X. collected the samples and extracted the DNA. H.L. analyzed the  
326 data and wrote the manuscript. F.J., S.W., H.W., B.Y. and H.Z. provided helpful  
327 suggestions. W.F. conceived the study, designed the experiments, and revised the  
328 manuscript. All authors read and approved the final manuscript.

329 **Acknowledgements**

330 We thank Lingzhen Cao from Jiangxi Normal University, Limei He from Institute of  
331 Plant Protection, Chinese Academy of Agricultural Sciences for their assistance with  
332 sample collection.

333

334 **Table 1: Major indicators of the *P. flavescens* genome**

|                   | Assembly feature        | Value   |
|-------------------|-------------------------|---------|
| Contigs           | Estimated genome size   | 663Mbp  |
|                   | Counts of contigs       | 662Mbp  |
|                   | Counts of contigs       | 99      |
|                   | N50 size                | 16.2Mbp |
| Scaffolds         | Total size of scaffolds | 648Mbp  |
|                   | Counts of scaffolds     | 12      |
|                   | N50 size                | 53Mbp   |
| Genome annotation | Total gene number       | 15,354  |
|                   | Average CDS length      | 1,528   |
|                   | Average exon number     | 7.1     |
| Repeat annotation | SINEs                   | 35Kbp   |
|                   | LINES                   | 13Mbp   |
|                   | LTR                     | 1.2Mbp  |
|                   | DNA                     | 31Mbp   |
|                   | Unclassified            | 73Mbp   |

335

336 **Table 2: BUSCO assessment of gene sets of *P. flavescens* and other insecta species.**

| Species                     | C            | S            | D           | F           | M           |
|-----------------------------|--------------|--------------|-------------|-------------|-------------|
| <i>A. mellifera</i>         | 99.1%        | 61.4%        | 37.7%       | 0.2%        | 0.7%        |
| <i>T. castaneum</i>         | 99.0%        | 98.6%        | 0.4%        | 0.3%        | 0.7%        |
| <i>D. plexippus</i>         | 99.5%        | 97.7%        | 1.8%        | 0.2%        | 0.3%        |
| <i>D. melanogaster</i>      | 99.2%        | 98.3%        | 0.9%        | 0.6%        | 0.2%        |
| <i>A. pisum</i>             | 95.7%        | 89.6%        | 6.1%        | 1.0%        | 3.3%        |
| <i>F. occidentalis</i>      | 98.8%        | 97.1%        | 1.7%        | 0.7%        | 0.5%        |
| <i>Z. nevadensis</i>        | 98.0%        | 97.4%        | 0.6%        | 0.6%        | 0.8%        |
| <i>C. dipterum</i>          | 95.2%        | 91.8%        | 3.4%        | 1.0%        | 3.8%        |
| <b><i>P. flavescens</i></b> | <b>98.9%</b> | <b>95.5%</b> | <b>3.4%</b> | <b>0.0%</b> | <b>1.1%</b> |
| <i>L. fulva</i>             | 81.7%        | 79.7%        | 2.0%        | 13.0%       | 5.3%        |
| <i>C. aquilonaris</i>       | 85.0%        | 83.6%        | 1.4%        | 6.7%        | 8.3%        |

337 Note: Complete BUSCOs (C), Complete and single-copy BUSCOs (S), Complete and duplicated  
 338 BUSCOs (D), Fragmented BUSCOs (F), Missing BUSCOs (M).

339

## 340 Figure legends

341 **Figure 1. The genome landscape of *Pantala flavescens*.** Circular representation of the

342 chromosomes. Tracks a-d represents the distribution of tandem repeats density,  
343 transposable elements (TEs) density, gene density and GC density, respectively, with  
344 densities calculated in 500 Kb windows.

345 **Figure 2. X chromosome identification.** (a) Male and female sequence depth plotted  
346 in 500 bp of every chromosome. Red line represented the average sequencing depth. (b)  
347 Heterozygosity of X and autosome chromosome.

348 **Figure 3. Genome evolution of *P. flavescens*.** (a) Phylogenetic relationships and gene  
349 orthology of *P. flavescens* with other arthropoda species. The maximum likelihood  
350 phylogenomic tree was calculated based on 447 single-copy universal genes. (b)  
351 Demographic history of *P. flavescens* reconstructed from two adult resequencing data.  
352 Blue frame represents the geological events.

353

## 354 Reference

- 355 1. Li H-S, Huang Y-H, Chen M-L, Ren Z, Qiu B-Y, De Clercq P, et al. Genomic insight into  
356 diet adaptation in the biological control agent *Cryptolaemus montrouzieri*. BMC  
357 Genomics. 2021;22 1 doi:10.1186/s12864-021-07442-3.
- 358 2. Pang H and Slipinski A. Revision of the Australian Coccinellidae (Coleoptera). Genus  
359 *Diomus* Mulsant. Part 1. *Annales Zoologici*. 2009;59:645-702.  
360 doi:10.3161/000345409X485008.
- 361 3. Smith S. Biological Control with *Trichogramma*: Advances, Successes, and Potential  
362 of Their Use. *Annual review of entomology* Vol 41. 1996;41:375-406.  
363 doi:10.1146/annurev.ento.41.1.375.
- 364 4. Cao LZ, Fu XW, Hu CX and Wu KM. Seasonal Migration of *Pantala flavescens* Across  
365 the Bohai Strait in Northern China. *Environ Entomol*. 2018;47 2:264-70.  
366 doi:10.1093/ee/nvy017.

- 367 5. Guo J, Fu X, Zhao S, Shen X, Wyckhuys KAG and Wu K. Long-term shifts in  
368 abundance of (migratory) crop-feeding and beneficial insect species in northeastern  
369 Asia. *Journal of Pest Science*. 2020;93 2:583-94. doi:10.1007/s10340-019-01191-9.
- 370 6. Artiss T. Phylogeography of a facultatively migratory dragonfly,  
371 *Libellula quadrimaculata* (Odonata: Anisoptera). *Hydrobiologia*. 2004;515 1:225-34.  
372 doi:10.1023/B:HYDR.0000027332.57786.9d.
- 373 7. Feng H-Q, Wu K-M, Ni Y-X, Cheng D-F and Guo Y-Y. Nocturnal migration of  
374 dragonflies over the Bohai Sea in northern China. *Ecological Entomology*. 2006;31  
375 5:511-20. doi:<https://doi.org/10.1111/j.1365-2311.2006.00813.x>.
- 376 8. Anderson RC. Do Dragonflies Migrate across the Western Indian Ocean? *Journal of*  
377 *Tropical Ecology*. 2009;25 4:347-58.
- 378 9. Bybee S, Cordoba-Aguilar A, Duryea MC, Futahashi R, Hansson B, Lorenzo-Carballe  
379 MO, et al. Odonata (dragonflies and damselflies) as a bridge between ecology and  
380 evolutionary genomics. *Front Zool*. 2016;13:46. doi:10.1186/s12983-016-0176-7.
- 381 10. Zhang Z-Q. Animal biodiversity: An outline of higher-level classification and survey of  
382 taxonomic richness (Addenda 2013). *Zootaxa*. 2013;3703:1-82.  
383 doi:10.11646/zootaxa.3703.1.1.
- 384 11. Ware J, May M and Kjer K. Phylogeny of the higher Libelluloidea (Anisoptera: Odonata):  
385 an exploration of the most speciose superfamily of dragonflies. *Mol Phylogenet Evol*.  
386 2007;45 1:289-310. doi:10.1016/j.ympev.2007.05.027.
- 387 12. Misof B, Liu S, Meusemann K, Peters RS, Donath A, Mayer C, et al. Phylogenomics  
388 resolves the timing and pattern of insect evolution. *Science*. 2014;346 6210:763.

- 389 doi:10.1126/science.1257570.
- 390 13. STORK NE. Insect diversity: facts, fiction and speculation\*. 1988;35 4:321-37.  
391 doi:<https://doi.org/10.1111/j.1095-8312.1988.tb00474.x>.
- 392 14. Stork NE, McBroom J, Gely C and Hamilton AJ. New approaches narrow global  
393 species estimates for beetles, insects, and terrestrial arthropods. Proc Natl Acad Sci U  
394 S A. 2015;112 24:7519-23. doi:10.1073/pnas.1502408112.
- 395 15. Chauhan P, Swaegers J, Sanchez-Guillen RA, Svensson EI, Wellenreuther M and  
396 Hansson B. Genome assembly, sex-biased gene expression and dosage  
397 compensation in the damselfly *Ischnura elegans*. Genomics. 2021;113 4:1828-37.  
398 doi:10.1016/j.ygeno.2021.04.003.
- 399 16. Thomas GWC, Dohmen E, Hughes DST, Murali SC, Poelchau M, Glastad K, et al.  
400 Gene content evolution in the arthropods. Genome Biol. 2020;21 1:15.  
401 doi:10.1186/s13059-019-1925-7.
- 402 17. Root TL and Schneider SH. Ecology and Climate: Research Strategies and  
403 Implications. Science. 1995;269 5222:334. doi:10.1126/science.269.5222.334.
- 404 18. Wenger AM, Peluso P, Rowell WJ, Chang PC, Hall RJ, Concepcion GT, et al. Accurate  
405 circular consensus long-read sequencing improves variant detection and assembly of  
406 a human genome. Nat Biotechnol. 2019;37 10:1155-62. doi:10.1038/s41587-019-  
407 0217-9.
- 408 19. Cheng H, Concepcion GT, Feng X, Zhang H and Li H. Haplotype-resolved de novo  
409 assembly using phased assembly graphs with hifiasm. Nat Methods. 2021;18 2:170-5.  
410 doi:10.1038/s41592-020-01056-5.

- 411 20. Nurk S, Walenz BP, Rhie A, Vollger MR, Logsdon GA, Grothe R, et al. HiCanu:  
412 accurate assembly of segmental duplications, satellites, and allelic variants from high-  
413 fidelity long reads. *Genome Res.* 2020;30 9:1291-305. doi:10.1101/gr.263566.120.
- 414 21. Guan D, McCarthy SA, Wood J, Howe K, Wang Y and Durbin R. Identifying and  
415 removing haplotypic duplication in primary genome assemblies. *Bioinformatics.*  
416 2020;36 9:2896-8. doi:10.1093/bioinformatics/btaa025 %J *Bioinformatics.*
- 417 22. Simão FA, Waterhouse RM, Ioannidis P, Kriventseva EV and Zdobnov EM. BUSCO:  
418 assessing genome assembly and annotation completeness with single-copy orthologs.  
419 *Bioinformatics.* 2015;31 19:3210-2. doi:10.1093/bioinformatics/btv351.
- 420 23. Wu T and Watanabe C. GMAP: A genomic mapping and alignment program for mRNA  
421 and EST sequences. *Bioinformatics (Oxford, England).* 2005;21:1859-75.  
422 doi:10.1093/bioinformatics/bti310.
- 423 24. Burton JN, Adey A, Patwardhan RP, Qiu R, Kitzman JO and Shendure J.  
424 Chromosome-scale scaffolding of de novo genome assemblies based on chromatin  
425 interactions. *Nature Biotechnology.* 2013;31 12:1119-25. doi:10.1038/nbt.2727.
- 426 25. Stanke M, Steinkamp R, Waack S and Morgenstern B. AUGUSTUS: a web server for  
427 gene finding in eukaryotes. *Nucleic Acids Res.* 2004;32 Web Server issue:W309-12.  
428 doi:10.1093/nar/gkh379.
- 429 26. Haas BJ, Salzberg SL, Zhu W, Pertea M, Allen JE, Orvis J, et al. Automated eukaryotic  
430 gene structure annotation using EVIDENCEModeler and the Program to Assemble  
431 Spliced Alignments. *Genome Biol.* 2008;9 1:R7. doi:10.1186/gb-2008-9-1-r7.
- 432 27. Schwager EE, Sharma PP, Clarke T, Leite DJ, Wierschin T, Pechmann M, et al. The



433 house spider genome reveals an ancient whole-genome duplication during arachnid  
434 evolution. BMC Biology. 2017;15 1:62. doi:10.1186/s12915-017-0399-x.

435 28. Chipman AD, Ferrier DE, Brena C, Qu J, Hughes DS, Schröder R, et al. The first  
436 myriapod genome sequence reveals conservative arthropod gene content and genome  
437 organisation in the centipede *Strigamia maritima*. PLoS biology. 2014;12 11:e1002005.  
438 doi:10.1371/journal.pbio.1002005.

439 29. Colbourne JK, Pfrender ME, Gilbert D, Thomas WK, Tucker A, Oakley TH, et al. The  
440 ecoresponsive genome of *Daphnia pulex*. Science. 2011;331 6017:555-61.  
441 doi:10.1126/science.1197761.

442 30. Faddeeva-Vakhrusheva A, Kraaijeveld K, Derks MFL, Anvar SY, Agamennone V,  
443 Suring W, et al. Coping with living in the soil: the genome of the parthenogenetic  
444 springtail *Folsomia candida*. BMC Genomics. 2017;18 1:493. doi:10.1186/s12864-017-  
445 3852-x.

446 31. Almudi I, Vizueta J, Wyatt CDR, de Mendoza A, Marletaz F, Firbas PN, et al. Genomic  
447 adaptations to aquatic and aerial life in mayflies and the origin of insect wings. Nat  
448 Commun. 2020;11 1:2631. doi:10.1038/s41467-020-16284-8.

449 32. Terrapon N, Li C, Robertson HM, Ji L, Meng X, Booth W, et al. Molecular traces of  
450 alternative social organization in a termite genome. Nature Communications. 2014;5  
451 1:3636. doi:10.1038/ncomms4636.

452 33. Li Y, Park H, Smith TE and Moran NA. Gene Family Evolution in the Pea Aphid Based  
453 on Chromosome-Level Genome Assembly. Mol Biol Evol. 2019;36 10:2143-56.  
454 doi:10.1093/molbev/msz138.

- 455 34. Clark AG, Eisen MB, Smith DR, Bergman CM, Oliver B, Markow TA, et al. Evolution of  
456 genes and genomes on the *Drosophila* phylogeny. *Nature*. 2007;450 7167:203-18.  
457 doi:10.1038/nature06341.
- 458 35. Zhan S, Merlin C, Boore Jeffrey L and Reppert Steven M. The Monarch Butterfly  
459 Genome Yields Insights into Long-Distance Migration. *Cell*. 2011;147 5:1171-85.  
460 doi:<https://doi.org/10.1016/j.cell.2011.09.052>.
- 461 36. Tribolium Genome Sequencing C, Richards S, Gibbs RA, Weinstock GM, Brown SJ,  
462 Denell R, et al. The genome of the model beetle and pest *Tribolium castaneum*. *Nature*.  
463 2008;452 7190:949-55. doi:10.1038/nature06784.
- 464 37. Wallberg A, Bunikis I, Vinnere Pettersson O, Mosbech M-B, Childers A, Evans J, et al.  
465 A hybrid de novo genome assembly of the honeybee, *Apis mellifera* , with  
466 chromosome-length scaffolds. *BMC Genomics* 20, 275 (2019).  
467 <https://doi.org/10.1186/s12864-019-5642-0>
- 468 38. Emms DM and Kelly S. OrthoFinder: solving fundamental biases in whole genome  
469 comparisons dramatically improves orthogroup inference accuracy. *Genome Biol*.  
470 2015;16:157. doi:10.1186/s13059-015-0721-2.
- 471 39. Edgar R. MUSCLE: Multiple Sequence Alignment with High Accuracy and High  
472 Throughput. *Nucleic acids research*. 2004;32:1792-7. doi:10.1093/nar/gkh340.
- 473 40. Stamatakis A. RAxML version 8: a tool for phylogenetic analysis and post-analysis of  
474 large phylogenies. *Bioinformatics*. 2014;30 9:1312-3.  
475 doi:10.1093/bioinformatics/btu033.
- 476 41. Yang Z. PAML 4: phylogenetic analysis by maximum likelihood. *Mol Biol Evol*. 2007;24

477 8:1586-91. doi:10.1093/molbev/msm088.

478 42. He Z, Zhang H, Gao S, Lercher MJ, Chen W-H and Hu S. Evolview v2: an online  
479 visualization and management tool for customized and annotated phylogenetic trees.  
480 Nucleic Acids Research. 2016;44 W1:W236-W41. doi:10.1093/nar/gkw370 %J Nucleic  
481 Acids Research.

482 43. Chen S, Zhou Y, Chen Y and Gu J. fastp: an ultra-fast all-in-one FASTQ preprocessor.  
483 Bioinformatics. 2018;34 17:i884-i90. doi:10.1093/bioinformatics/bty560 %J  
484 Bioinformatics.

485 44. Terhorst J, Kamm JA and Song YS. Robust and scalable inference of population history  
486 from hundreds of unphased whole genomes. Nat Genet. 2017;49 2:303-9.  
487 doi:10.1038/ng.3748.

488 45. Bachtrog D, Kirkpatrick M, Mank JE, McDaniel SF, Pires JC, Rice W, et al. Are all sex  
489 chromosomes created equal? Trends in Genetics. 2011;27 9:350-7.  
490 doi:<https://doi.org/10.1016/j.tig.2011.05.005>.

491 46. Bachtrog D, Mank JE, Peichel CL, Kirkpatrick M, Otto SP, Ashman TL, et al. Sex  
492 determination: why so many ways of doing it? PLoS Biol. 2014;12 7:e1001899.  
493 doi:10.1371/journal.pbio.1001899.

494 47. Rowe L, Chenoweth SF and Agrawal AF. The Genomics of Sexual Conflict. Am Nat.  
495 2018;192 2:274-86. doi:10.1086/698198.

496 48. Walia GK, Kaur H and Kaur J. Karyotypic Variations in the Chromosome Complement  
497 of *Pantala flavescens* (Fabricius) of the Family Libellulidae (Anisoptera: Odonata).  
498 Cytologia. 2011;76 3:301-7. doi:10.1508/cytologia.76.301.

- 499 49. Li Y, Zhang B and Moran NA. The Aphid X Chromosome Is a Dangerous Place for  
500 Functionally Important Genes: Diverse Evolution of Hemipteran Genomes Based on  
501 Chromosome-Level Assemblies. *Mol Biol Evol.* 2020;37 8:2357-68.  
502 doi:10.1093/molbev/msaa095.
- 503 50. Castillo ER, Marti DA and Bidau CJ. Sex and Neo-Sex Chromosomes in Orthoptera: A  
504 Review\*. *Journal of Orthoptera Research.* 2010;19 2:213-31.  
505 doi:10.1665/034.019.0207.
- 506 51. Li Y, Park H, Smith TE, Moran NA and Singh N. Gene Family Evolution in the Pea  
507 Aphid Based on Chromosome-Level Genome Assembly. *Molecular Biology and*  
508 *Evolution.* 2019;36 10:2143-56. doi:10.1093/molbev/msz138.
- 509 52. Bolton PE, Rollins LA, Brazill-Boast J, Maute KL, Legge S, Austin JJ, et al. Genetic  
510 diversity through time and space: diversity and demographic history from natural history  
511 specimens and serially sampled contemporary populations of the threatened Gouldian  
512 finch (*Erythrura gouldiae*). *Conservation Genetics.* 2018;19 3:737-54.  
513 doi:10.1007/s10592-018-1051-1.
- 514 53. Wang J, Santiago E and Caballero A. Prediction and estimation of effective population  
515 size. *Heredity.* 2016;117 4:193-206. doi:10.1038/hdy.2016.43.
- 516 54. Hewitt G. The genetic legacy of the Quaternary ice ages. *Nature.* 2000;405 6789:907-  
517 13. doi:10.1038/35016000.
- 518 55. Clark PU, Dyke AS, Shakun JD, Carlson AE, Clark J, Wohlfarth B, et al. The Last  
519 Glacial Maximum. *Science.* 2009;325 5941:710-4. doi:10.1126/science.1172873.
- 520 56. Zhao S, Zheng P, Dong S, Zhan X, Wu Q, Guo X, et al. Whole-genome sequencing of

521 giant pandas provides insights into demographic history and local adaptation. Nat  
522 Genet. 2013;45 1:67-71. doi:10.1038/ng.2494.

523 57. Liu Q, Ruan J, Shi D, Chen B, Qian Q, Ye G, et al. Understanding divergent  
524 domestication traits from the whole-genome sequencing of swamp- and river-buffalo  
525 populations. National Science Review. 2020;7 3:686-701. doi:10.1093/nsr/nwaa024.

526 58. Feng S, Fang Q, Barnett R, Li C, Han S, Kuhlwilm M, et al. The Genomic Footprints of  
527 the Fall and Recovery of the Crested Ibis. Curr Biol. 2019;29 2:340-9 e7.  
528 doi:10.1016/j.cub.2018.12.008.

529 59. Liu HW, Jiang F, Wang S, Wang HC, Wang A, Zhao H, Xu D, Yang B, Fan W.  
530 Supporting data for "Chromosome-level genome of the globe skimmer dragonfly  
531 (Pantala flavescens)". GigaScience Database. <http://dx.doi.org/10.5524/100972> .

(a)

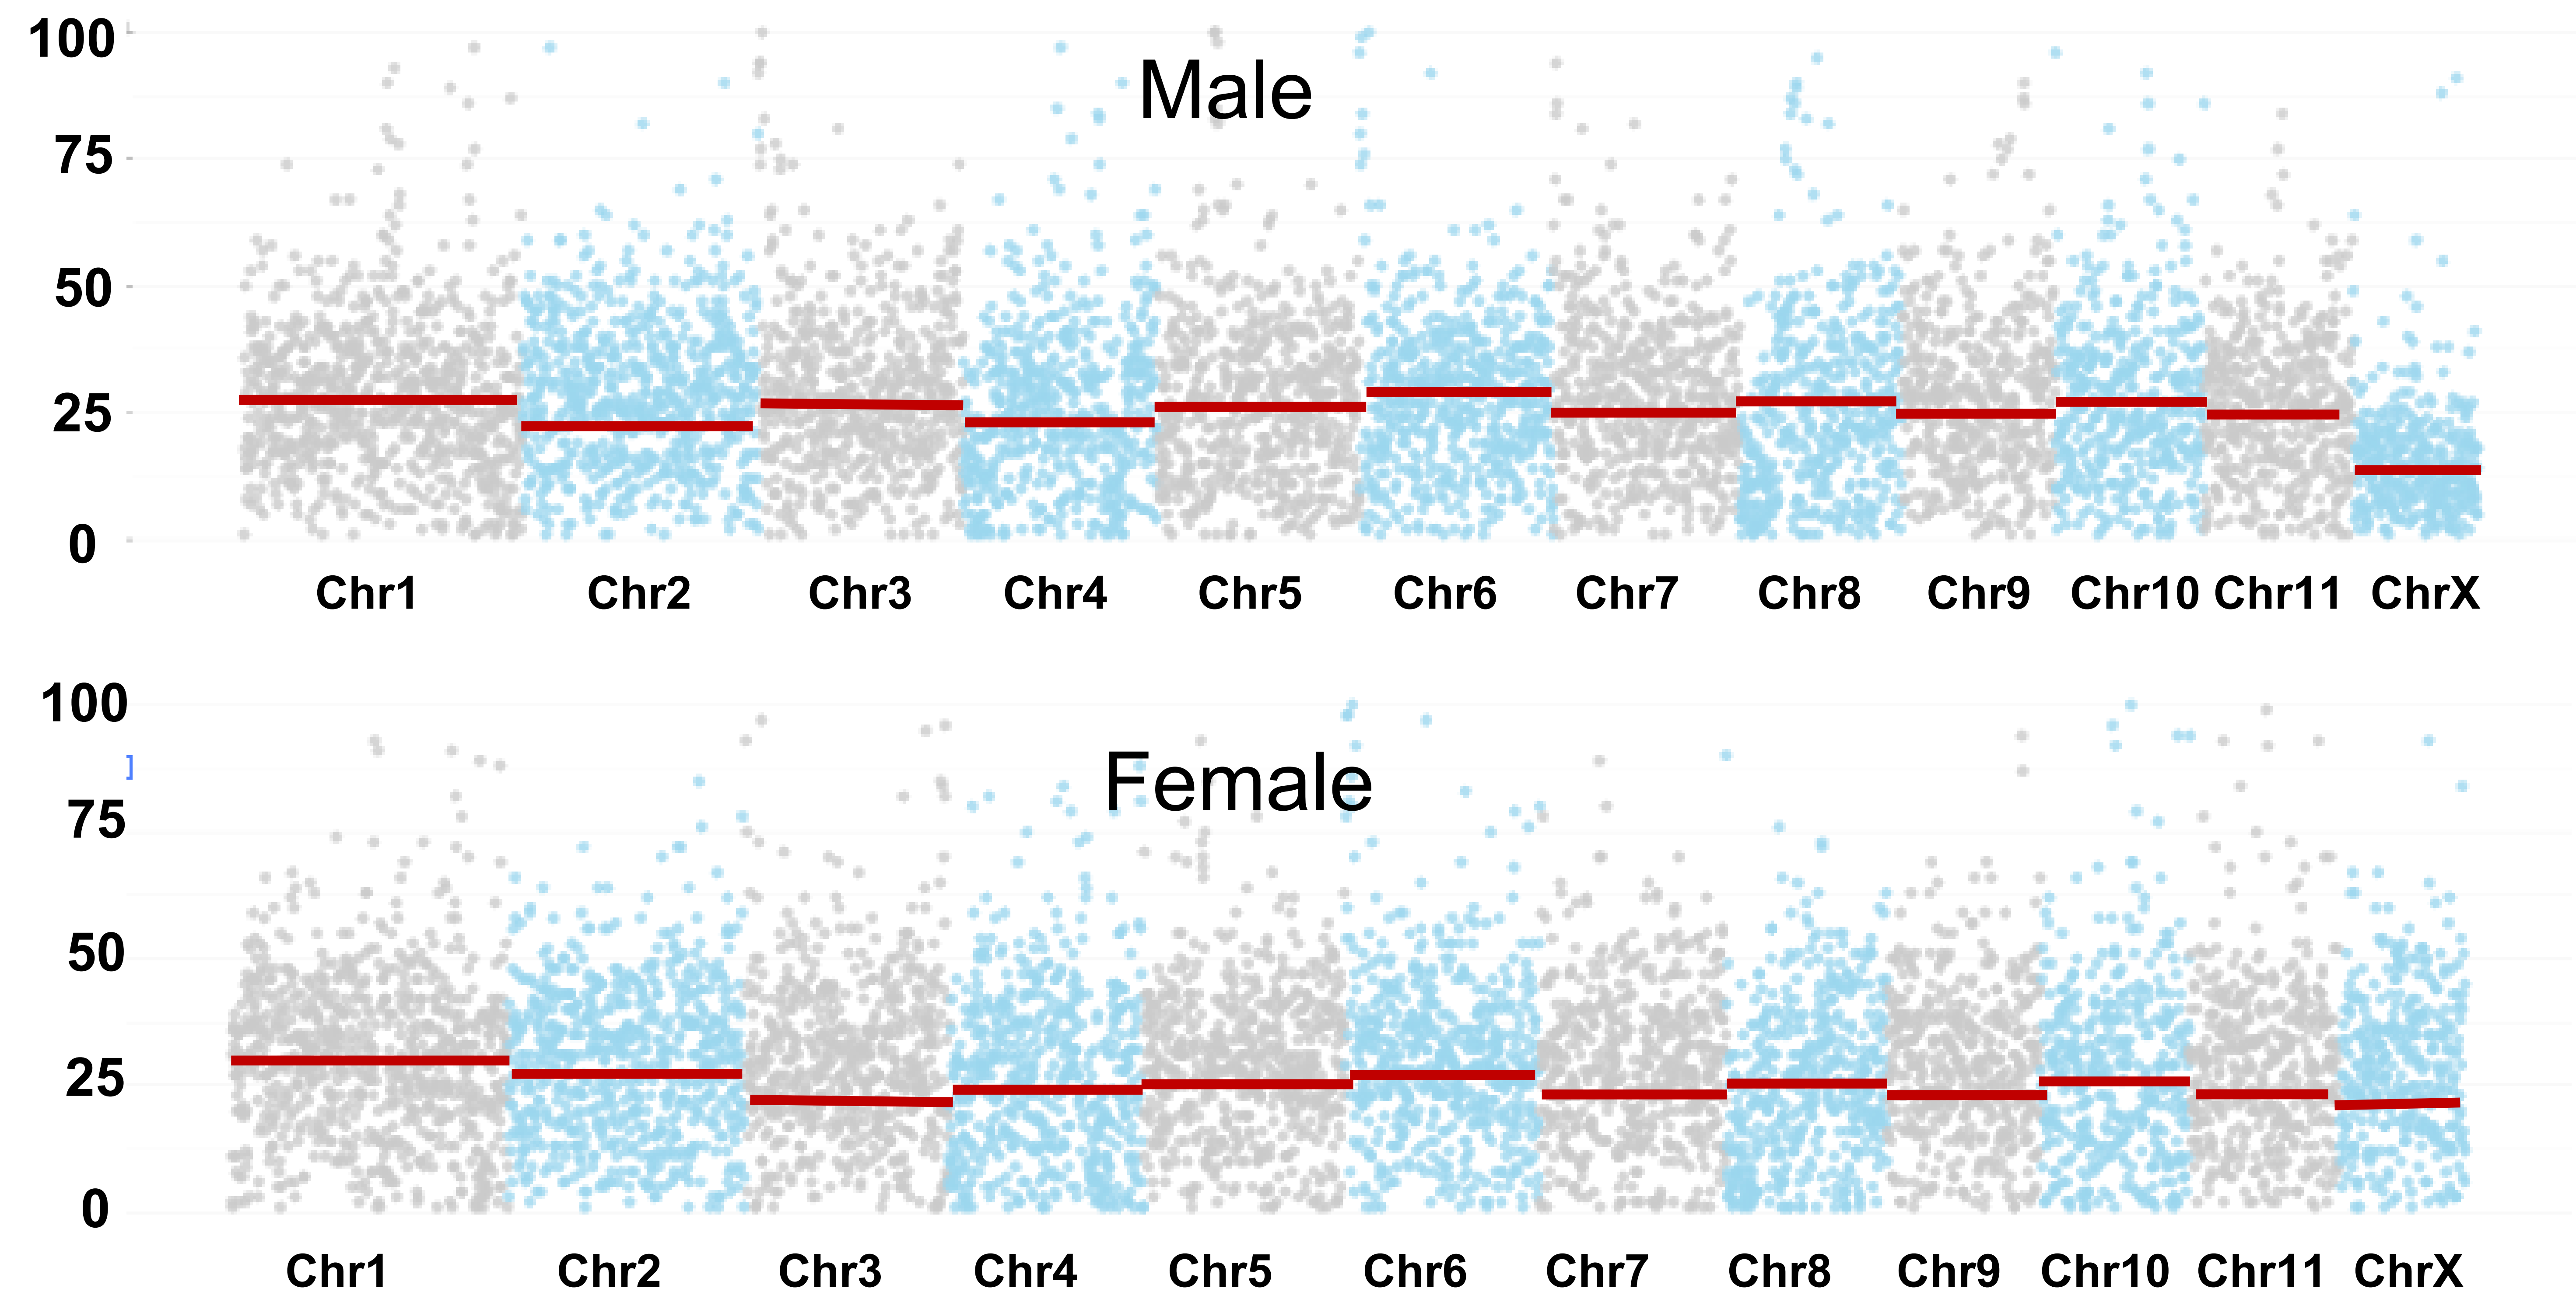

(b)

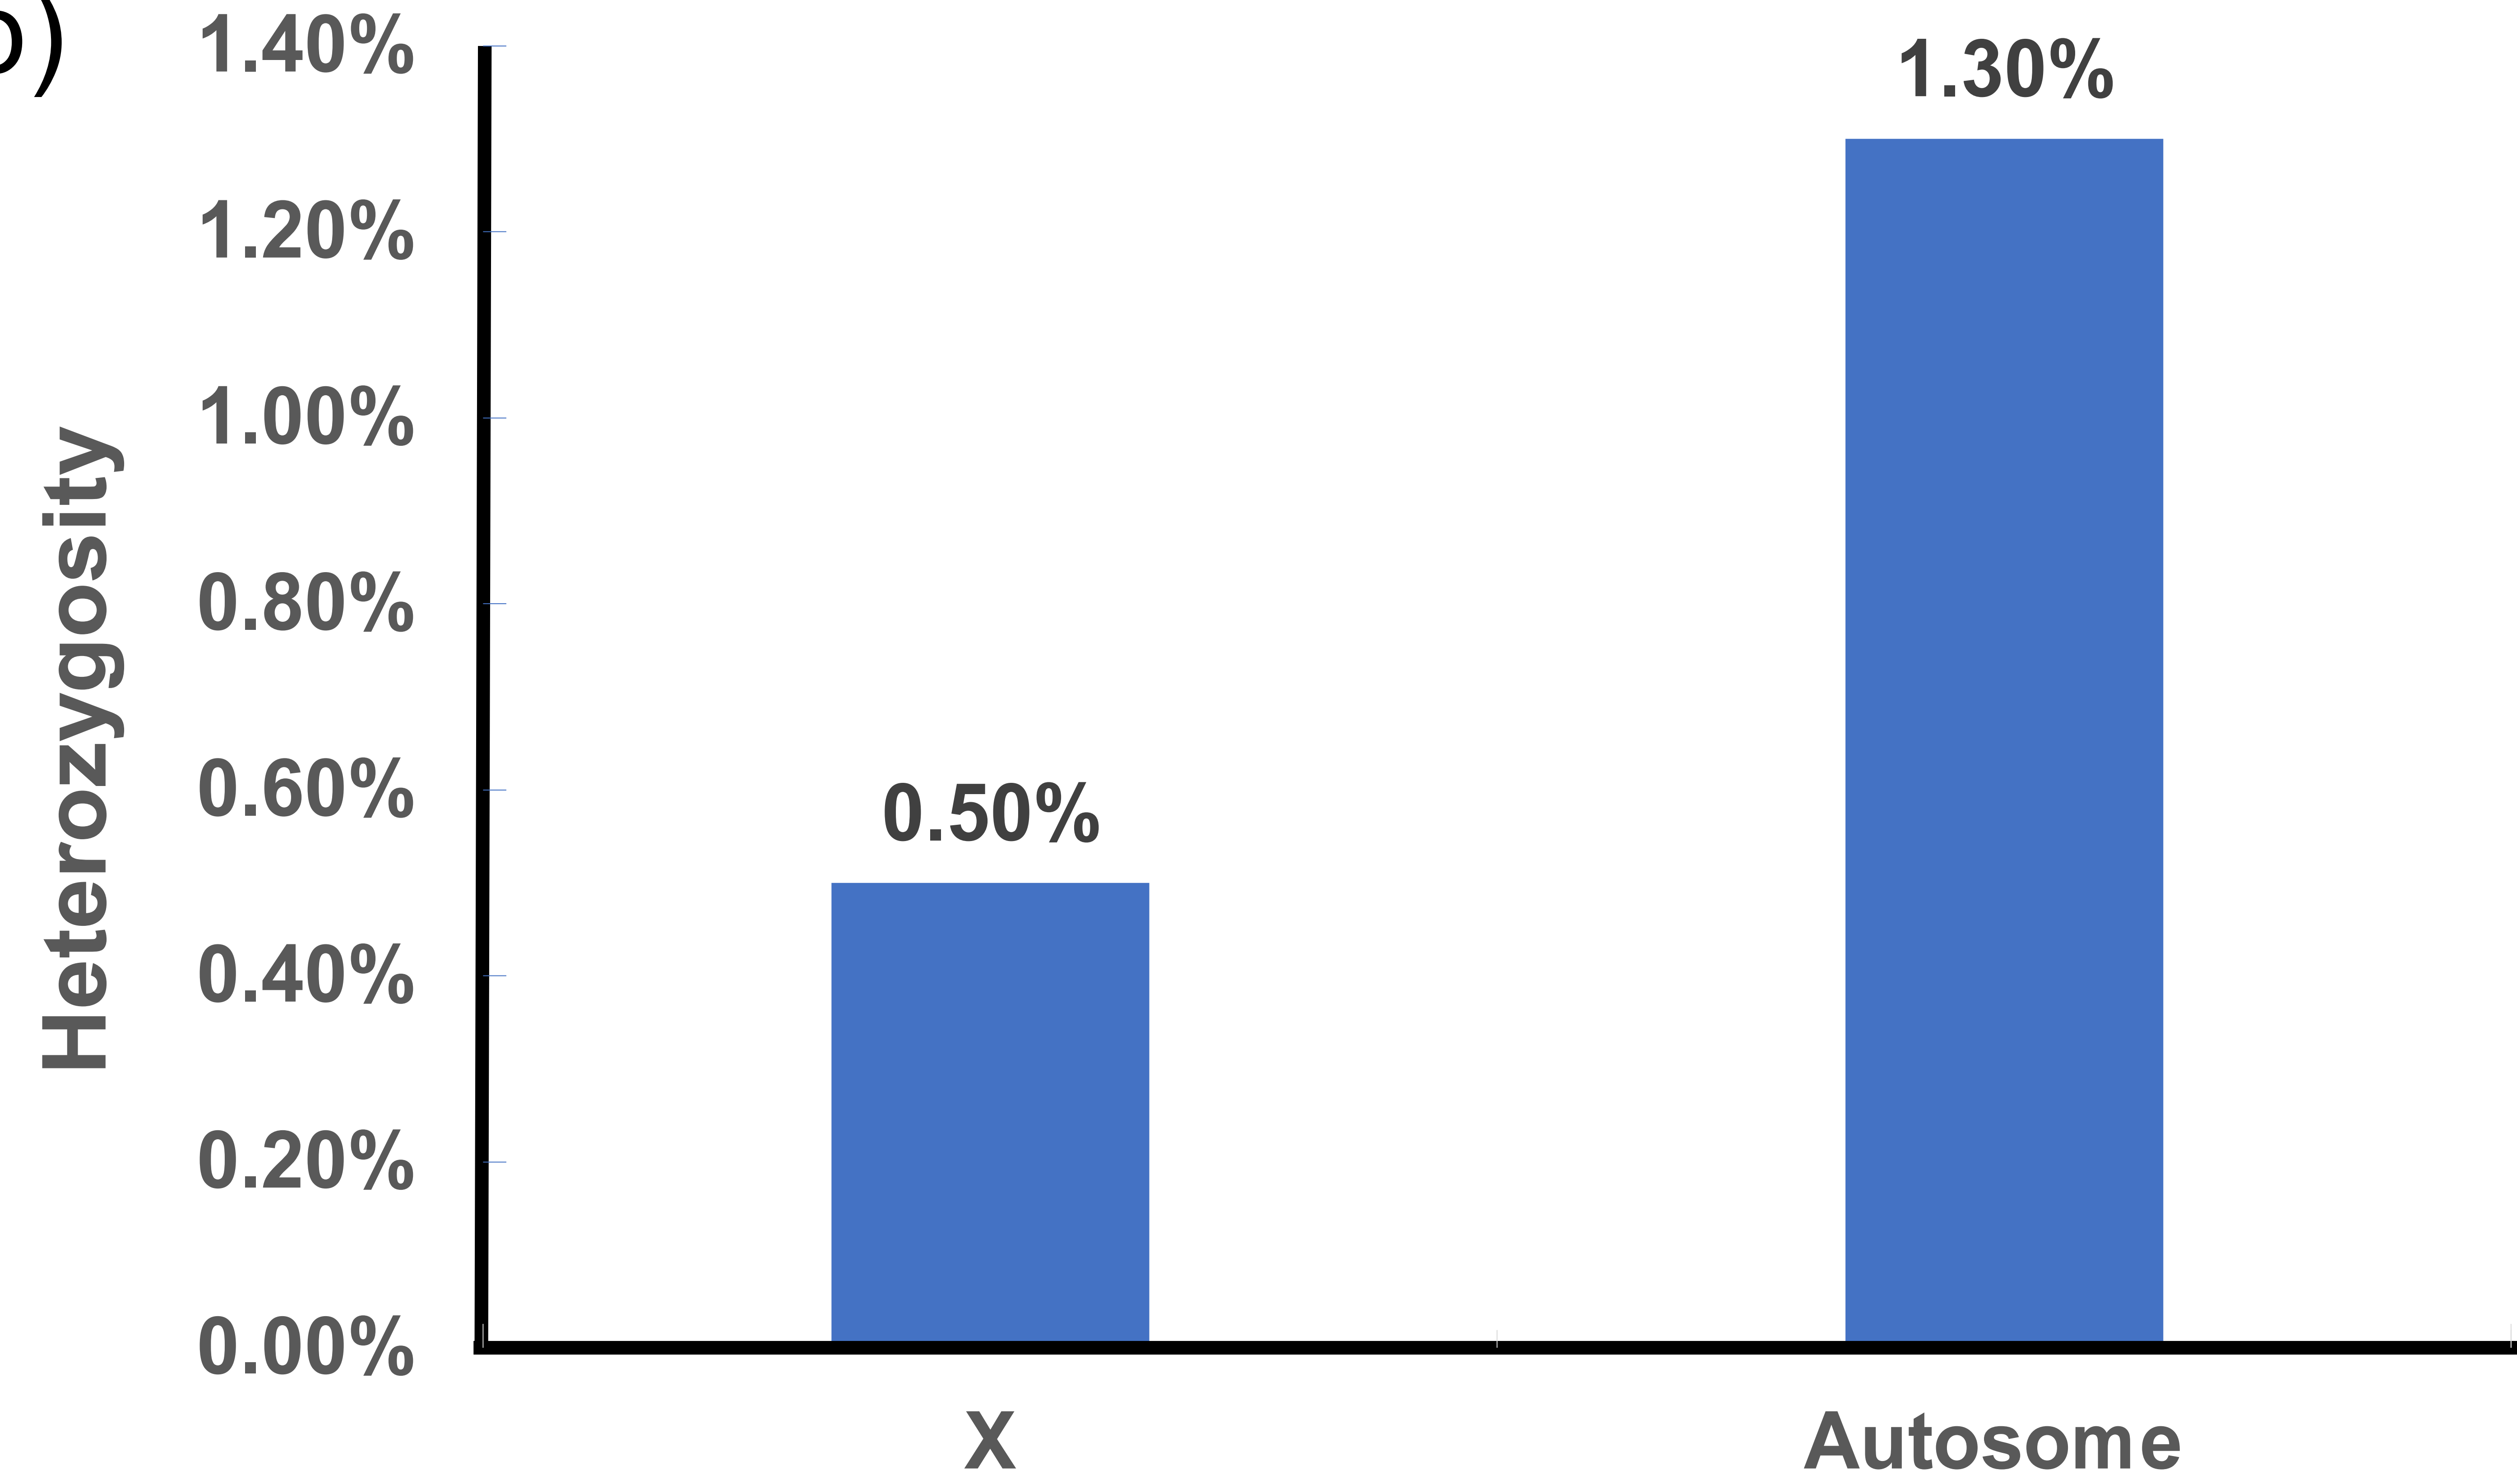

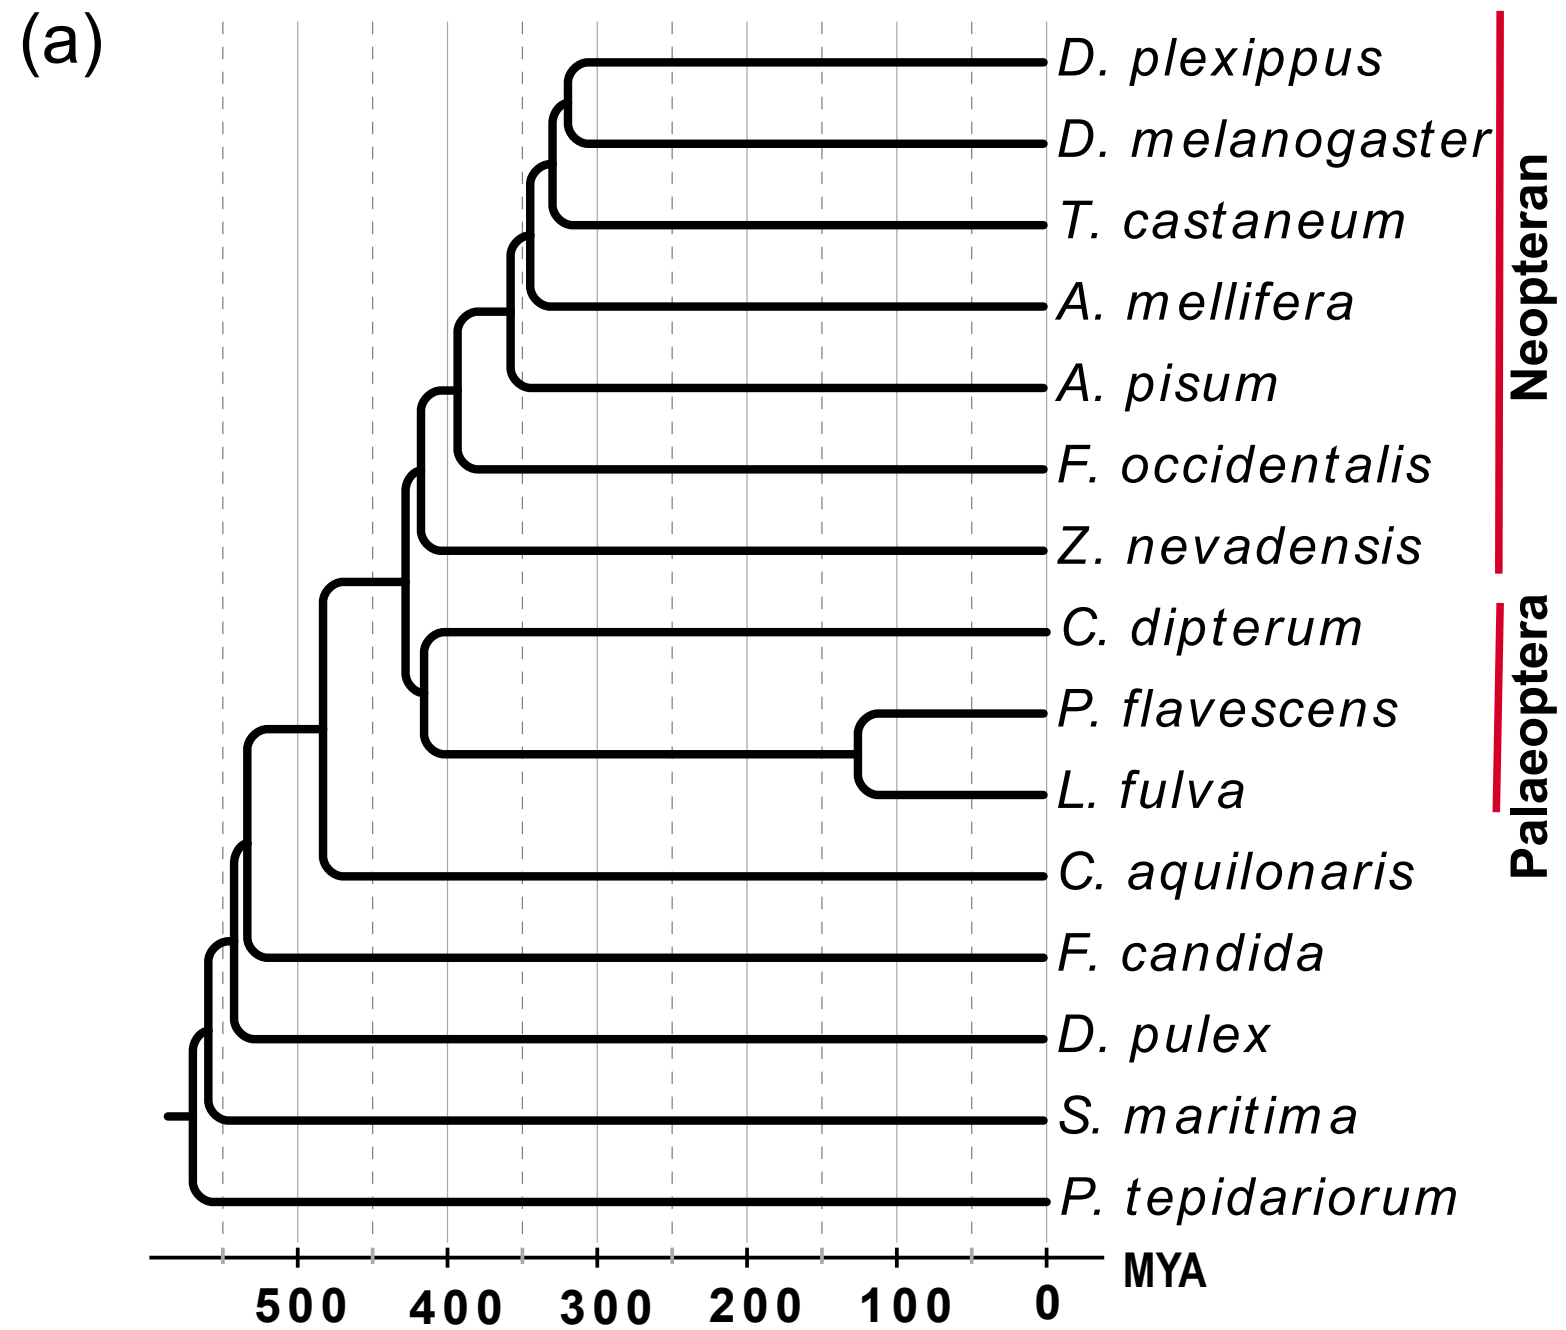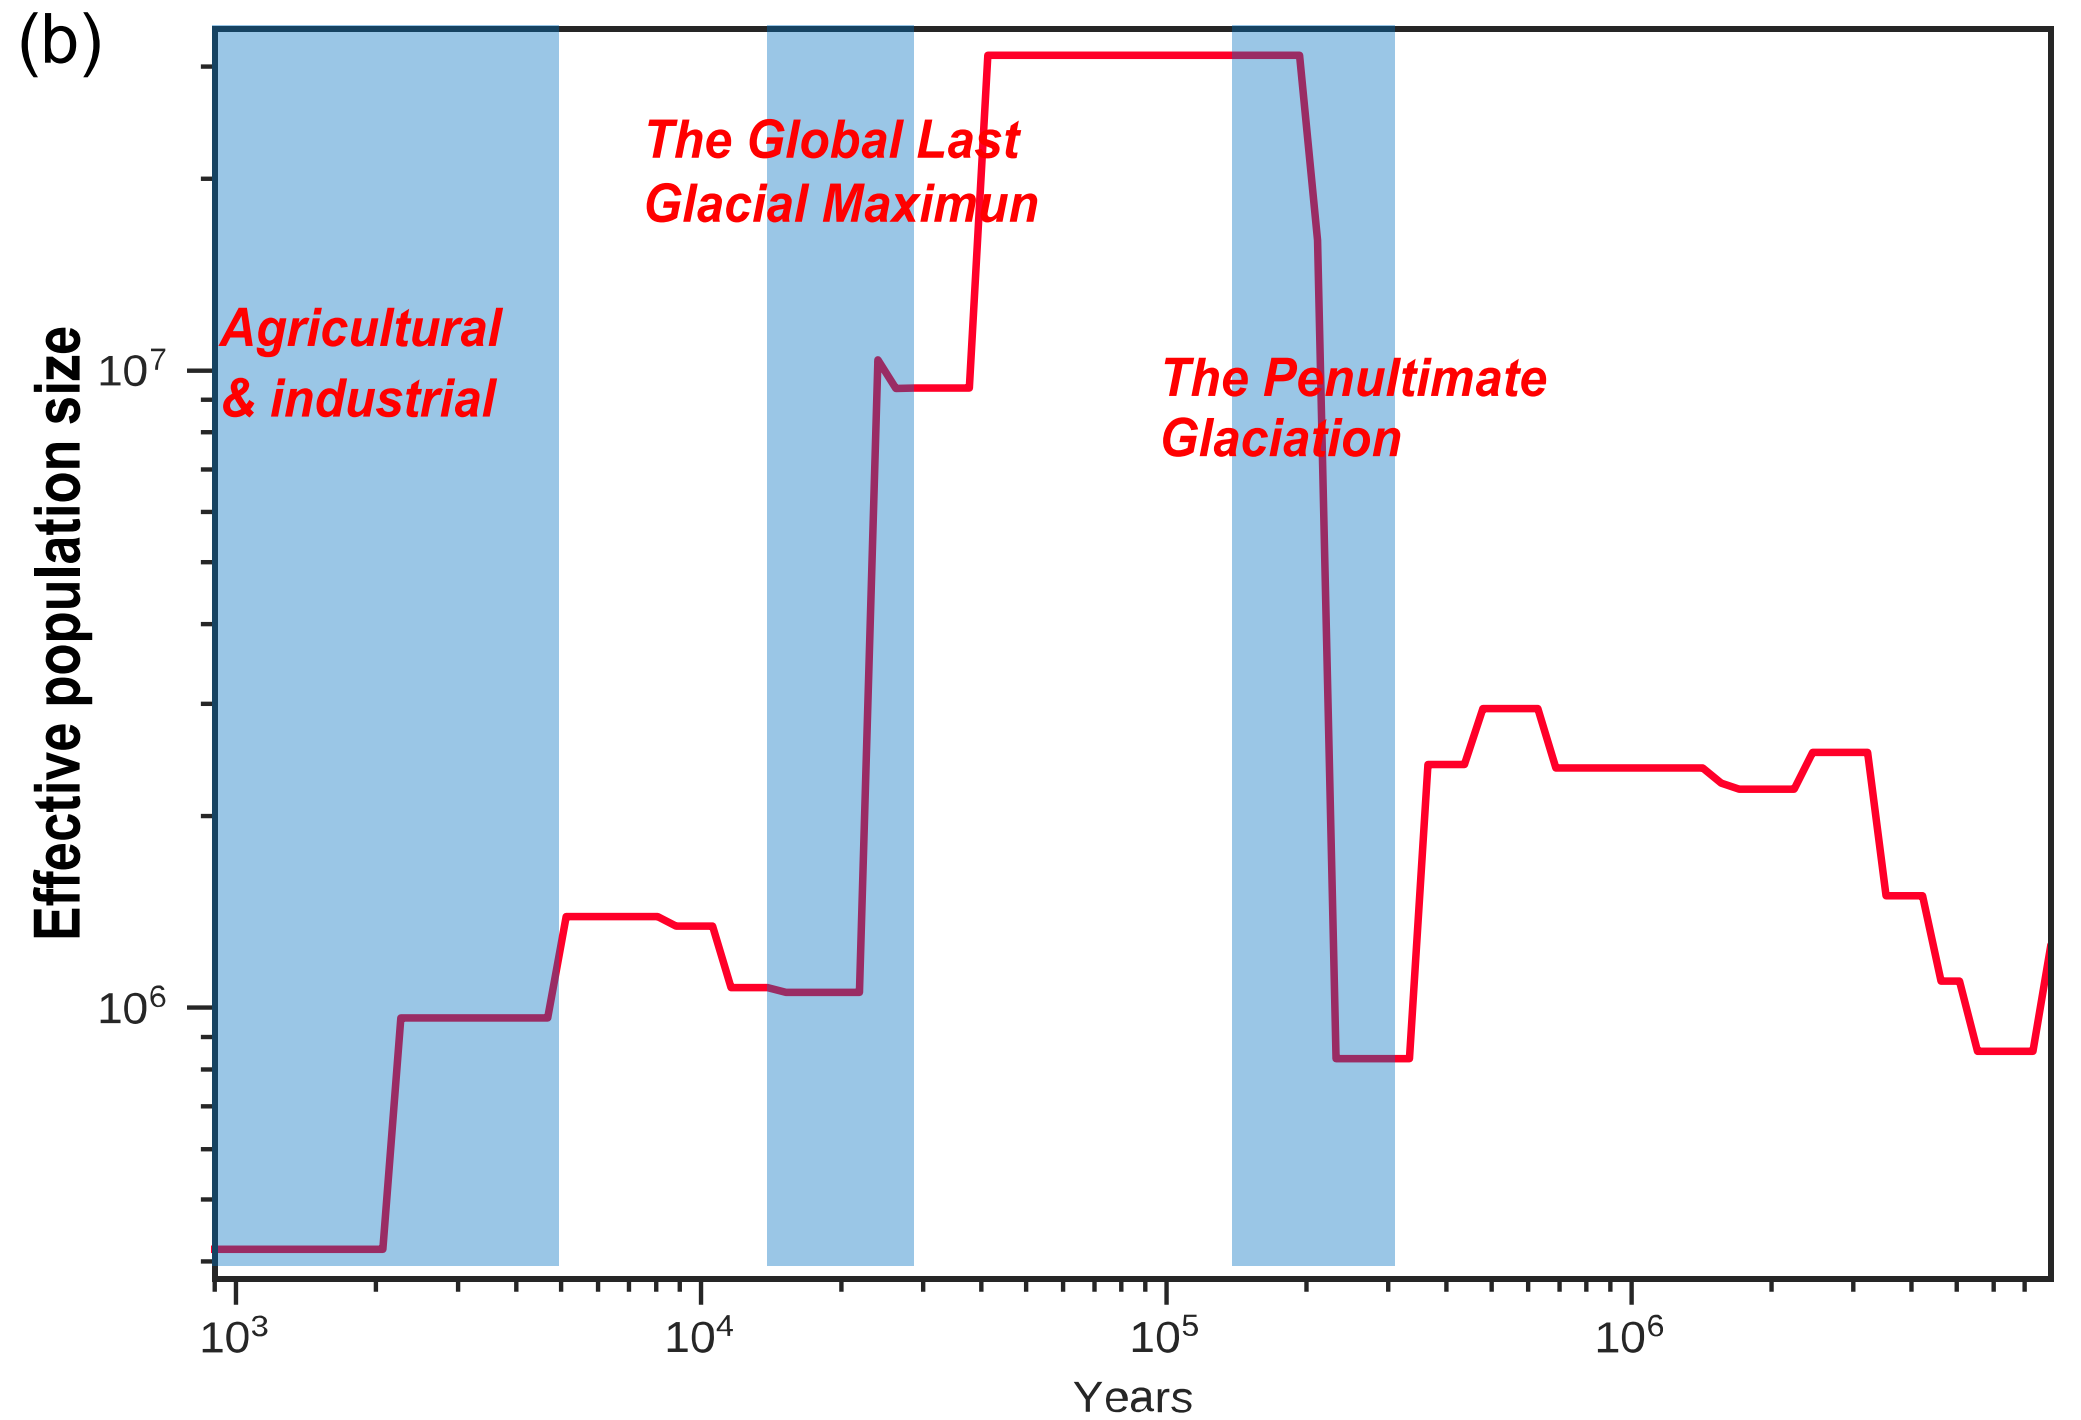



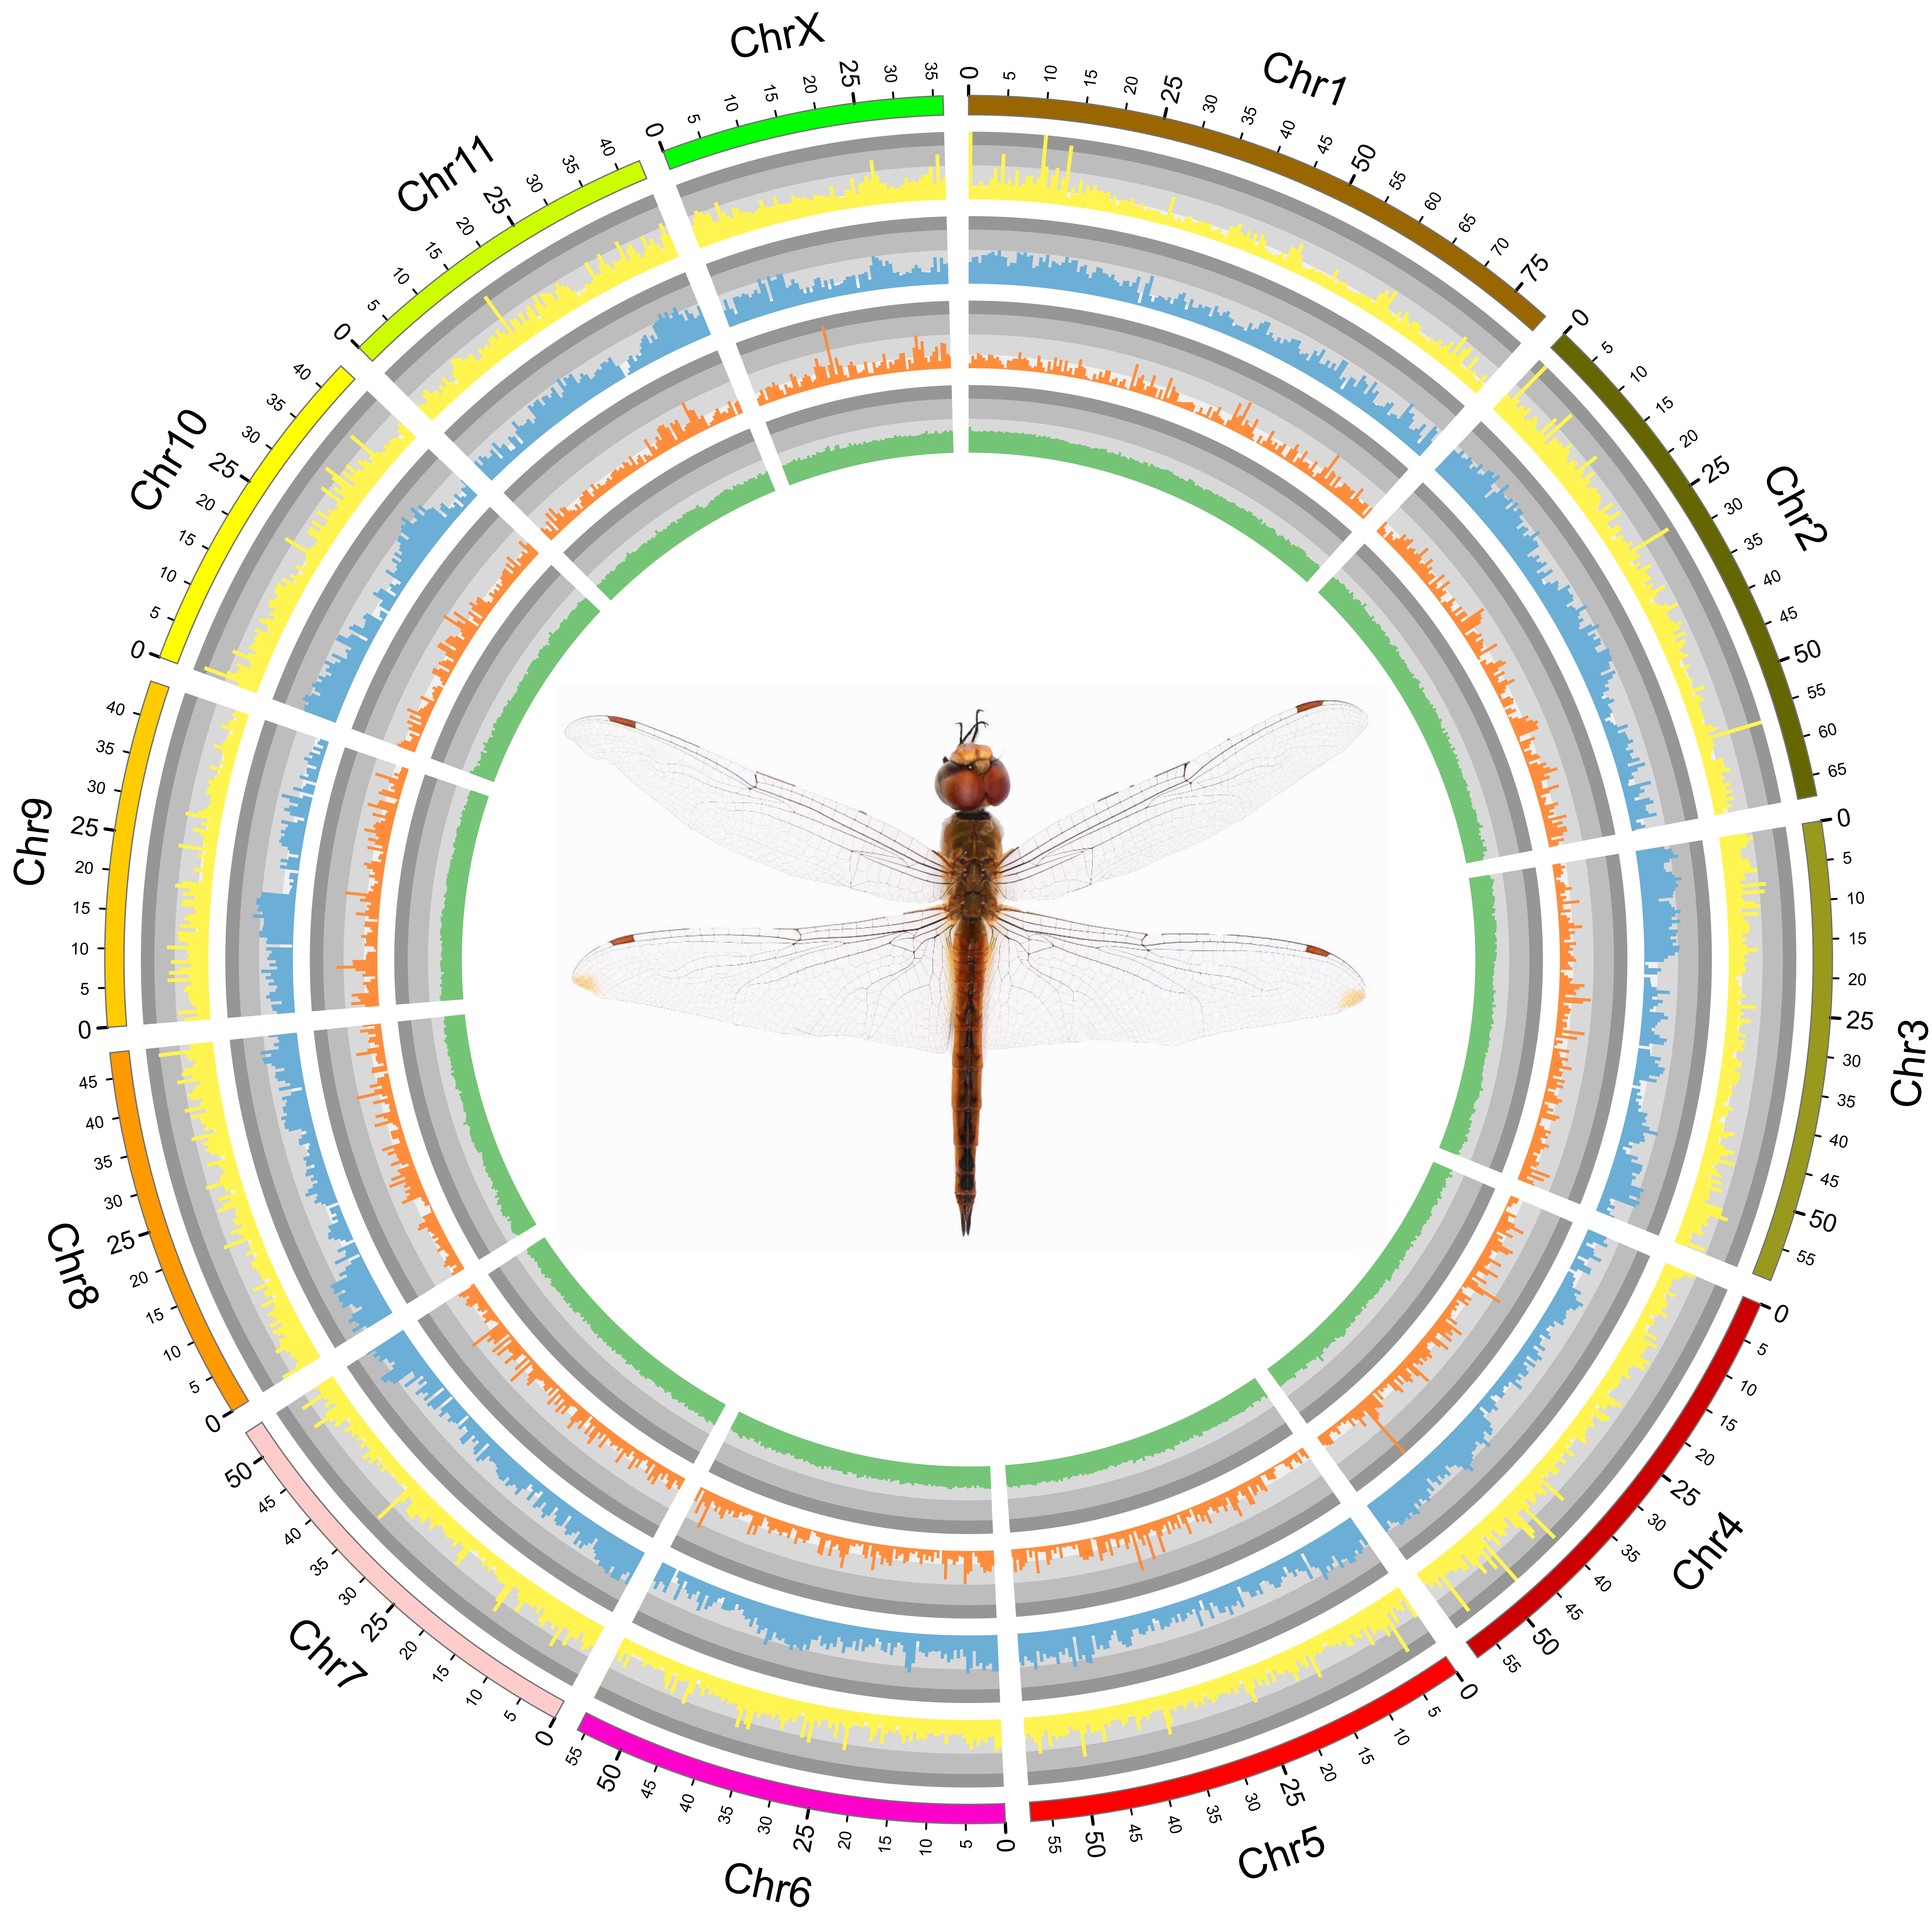



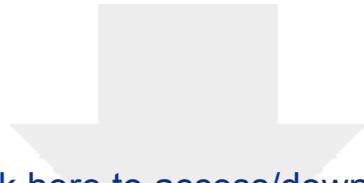

Click here to access/download  
**Supplementary Material**  
Supplementary Information-revised.docx

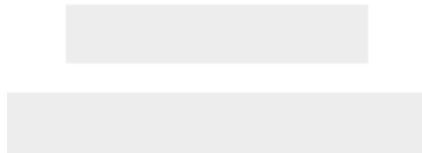

Dear Editor,

We are very grateful to your efforts to review our manuscript entitled “Chromosome - level genome of the globe skimmer dragonfly (*Pantala flavescens*)”. We have checked our manuscript carefully, and made improvements on both analyses and presentations according to your and the reviewers’ suggestions. Especially, we generated a new gene set, improving BUSCO complete ratio from 98.1% to 98.9%.

I believe that the revised manuscript is more informative, clear and compelling. The revised manuscript and the “responses to reviewers” have been uploaded online. If I can provide you with any further information or assistance, please feel free to contact me at [fanwei@caas.cn](mailto:fanwei@caas.cn).

Respectfully,

Fan wei

Guangdong Laboratory for Lingnan Modern Agriculture (Shenzhen Branch), Genome Analysis Laboratory of the Ministry of Agriculture and Rural Affairs, Agricultural Genomics Institute at Shenzhen, Chinese Academy of Agricultural Sciences, Shenzhen, Guangdong, 518120, China

Email: [fanwei@caas.cn](mailto:fanwei@caas.cn)
